# Supplementary material for: Preclinical Evaluation of the Safety and Immunological Action of Allogeneic ADSC-Collagen Scaffolds in the Treatment of Chronic Ischemic Cardiomyopathy
Source: MDPI journal article supplement (doi:10.3390/pharmaceutics13081269), 2021-08-17
Supplement: s1 [file s1]

# Supplementary Materials: Preclinical Evaluation of the Safety and Immunological Action of Allogeneic ADSC-Collagen Scaffolds in the Treatment of Chronic Ischemic Cardiomyopathy

Ascensión López-Díaz de Cerio, Iñigo Perez-Estenaga, Susana Inoges, Gloria Abizanda, Juan José Gavira, Eduardo Larequi, Enrique Andreu, Saray Rodriguez, Ana Gloria Gil, Verónica Crisostomo, Francisco Miguel Sanchez-Margallo, Javier Bermejo, Blanca Jauregui, Lluís Quintana, Francisco Fernández-Avilés, Beatriz Pelacho and Felipe Prósper

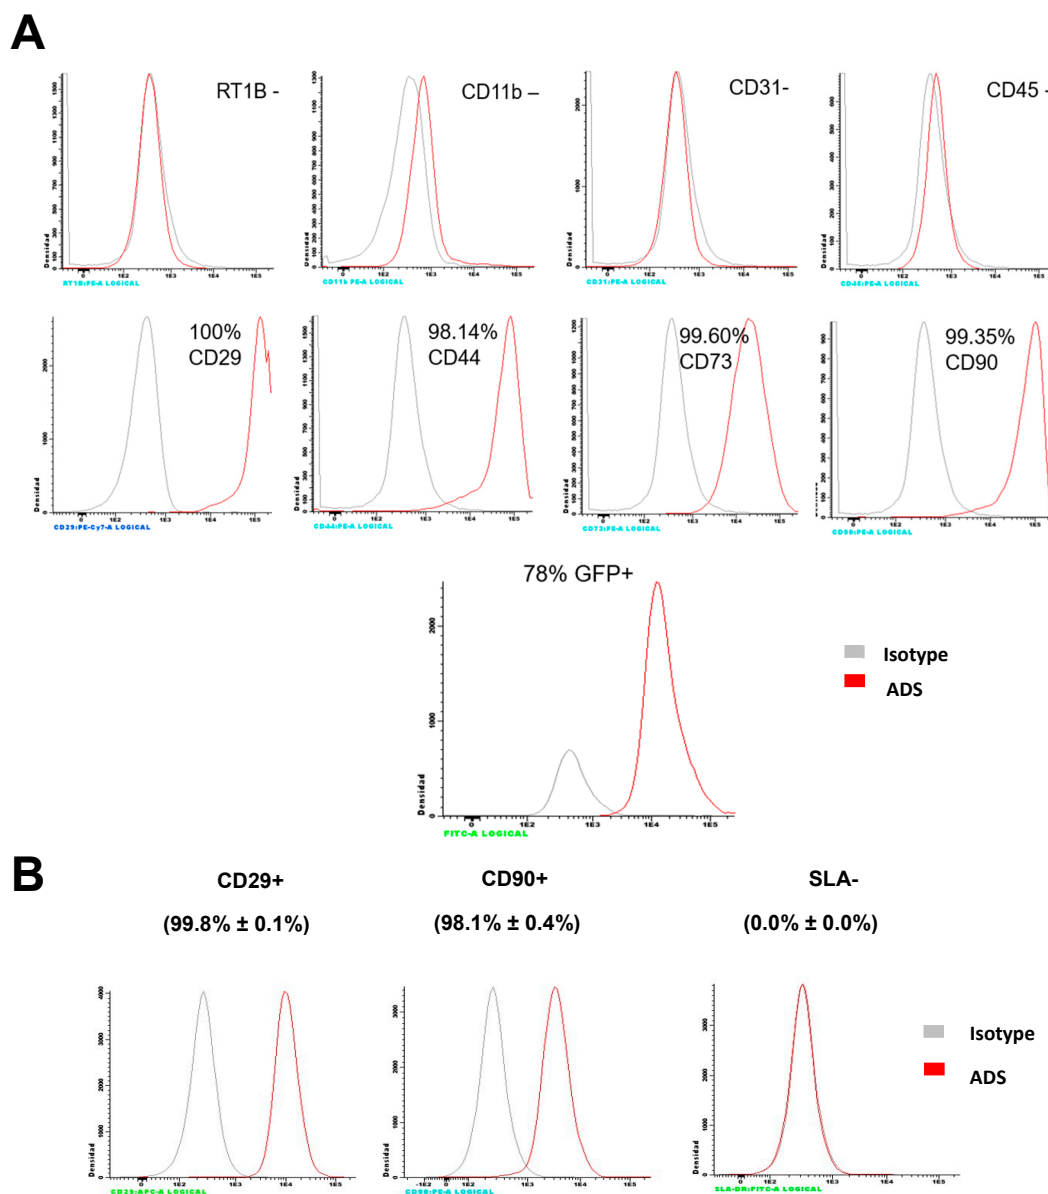

Figure S1. Phenotypic characterization of the rat and pig ADSCs.

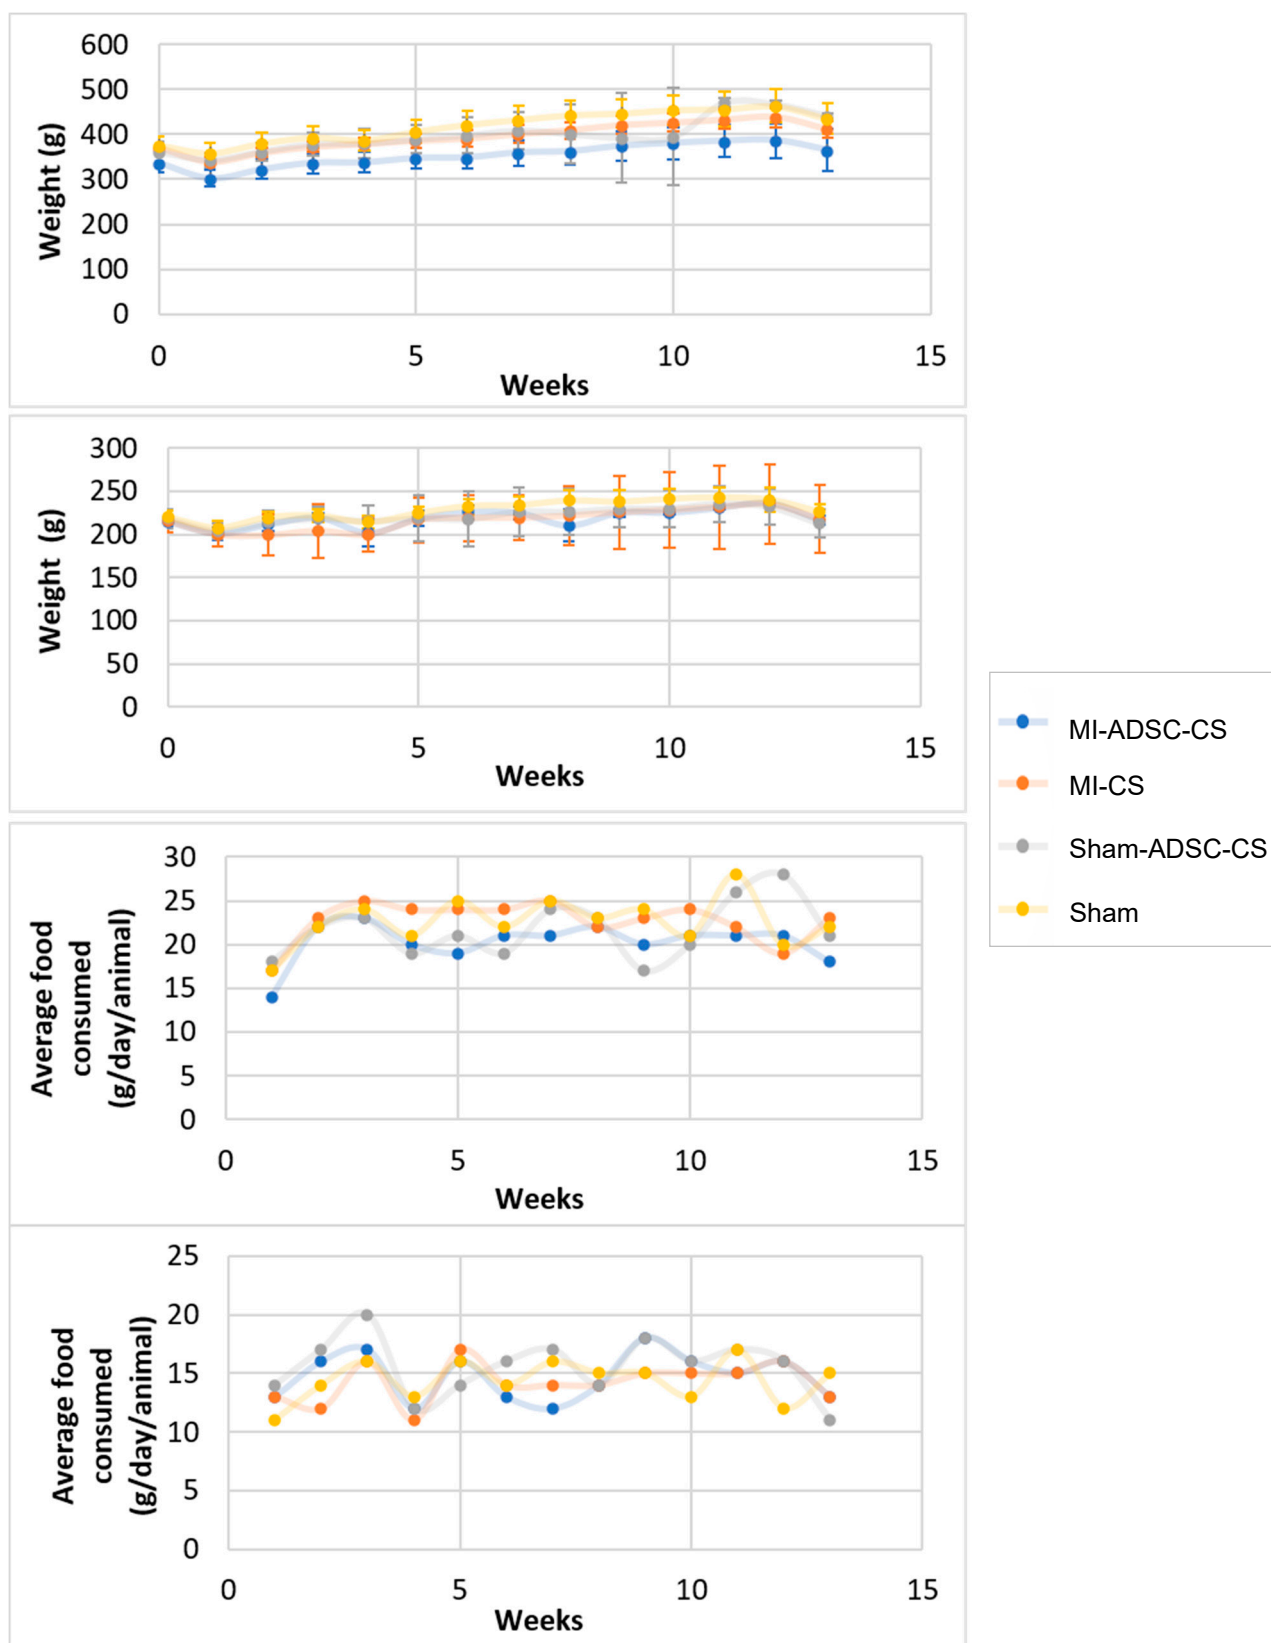

Figure S2. Animal weight and food intake during the toxicity study.

**Table S1.** Irwin's test for analysing general symptomatology in the MI-ADSC-CS group. The table shows, for each week, the number of animals in the MI-ADSC-CS group ( $n = 10$ ; 5 males and 5 females) that present the assigned evaluation. This evaluation corresponds to a normal symptomatology for RH-Foxn1<sup>mu</sup> rats.

| Studied parameters /<br>Assigned Evaluation | Observation period (weeks) |           |           |           |           |           | Observations                             |
|---------------------------------------------|----------------------------|-----------|-----------|-----------|-----------|-----------|------------------------------------------|
|                                             | Week<br>1                  | Week<br>2 | Week<br>3 | Week<br>4 | Week<br>5 | Week<br>6 |                                          |
| Visual location                             | 10/10                      | 10/10     | 10/10     | 9/10      | 9/9       | 9/9       | Week 4: Dead Female<br>10                |
| Spontaneous activity                        | 10/10                      | 10/10     | 10/10     | 10/10     | 9/9       | 9/9       |                                          |
| Reactivity                                  | 10/10                      | 10/10     | 10/10     | 10/10     | 9/9       | 9/9       |                                          |
| Contact response                            | 10/10                      | 10/10     | 10/10     | 10/10     | 9/9       | 9/9       |                                          |
| Pain response                               | 10/10                      | 10/10     | 10/10     | 10/10     | 9/9       | 9/9       |                                          |
| Fright response                             | 10/10                      | 10/10     | 10/10     | 10/10     | 9/9       | 9/9       |                                          |
| Stereotypies                                | 10/10                      | 10/10     | 10/10     | 10/10     | 9/9       | 9/9       |                                          |
| Vocalization                                | 10/10                      | 10/10     | 10/10     | 10/10     | 9/9       | 9/9       |                                          |
| Passivity                                   | 10/10                      | 10/10     | 10/10     | 10/10     | 9/9       | 9/9       |                                          |
| Irritability                                | 10/10                      | 10/10     | 10/10     | 10/10     | 9/9       | 9/9       |                                          |
| Fear                                        | 10/10                      | 10/10     | 10/10     | 10/10     | 9/9       | 9/9       |                                          |
| Aisle                                       | 10/10                      | 10/10     | 10/10     | 10/10     | 9/9       | 9/9       |                                          |
| Corporal position                           | 10/10                      | 10/10     | 10/10     | 10/10     | 9/9       | 9/9       |                                          |
| Press strength                              | 10/10                      | 10/10     | 10/10     | 10/10     | 9/9       | 9/9       |                                          |
| Corporal tone                               | 10/10                      | 10/10     | 10/10     | 10/10     | 9/9       | 9/9       |                                          |
| Members tone                                | 10/10                      | 10/10     | 10/10     | 10/10     | 9/9       | 9/9       |                                          |
| Atrium reflection                           | 10/10                      | 10/10     | 10/10     | 10/10     | 9/9       | 9/9       |                                          |
| Corneal reflex                              | 10/10                      | 10/10     | 10/10     | 10/10     | 9/9       | 9/9       |                                          |
| Ipsilateral reflex                          | 10/10                      | 10/10     | 10/10     | 10/10     | 9/9       | 9/9       |                                          |
| Balance                                     | 10/10                      | 10/10     | 10/10     | 9/10      | 9/9       | 9/9       | Not evaluated in<br>female 10            |
| Straightening reflex                        | 10/10                      | 10/10     | 10/10     | 9/10      | 9/9       | 9/9       | Not evaluated in<br>female 10            |
| Temblors                                    | 10/10                      | 10/10     | 10/10     | 10/10     | 9/9       | 9/9       |                                          |
| Contractions                                | 10/10                      | 10/10     | 10/10     | 10/10     | 9/9       | 9/9       |                                          |
| Ataxic march                                | 10/10                      | 10/10     | 10/10     | 10/10     | 9/9       | 9/9       |                                          |
| Hypotonic march                             | 10/10                      | 10/10     | 10/10     | 10/10     | 9/9       | 9/9       |                                          |
| Pelvic elevation                            | 10/10                      | 10/10     | 10/10     | 10/10     | 9/9       | 9/9       |                                          |
| Straub tail                                 | 10/10                      | 10/10     | 10/10     | 10/10     | 9/9       | 9/9       |                                          |
| Contortions                                 | 10/10                      | 10/10     | 10/10     | 10/10     | 9/9       | 9/9       |                                          |
| Pupillary size                              | 10/10                      | 10/10     | 10/10     | 10/10     | 9/9       | 9/9       |                                          |
| Palpebral opening                           | 10/10                      | 10/10     | 9/10      | 10/10     | 9/9       | 9/9       | Week 3: Male 4 - eyes<br>semi-closed     |
| Skin colour                                 | 10/10                      | 10/10     | 9/10      | 9/10      | 8/9       | 8/9       | Week 3-4: Male 2 -<br>mild skin paleness |
| Cardiac frequency                           | 10/10                      | 10/10     | 10/10     | 10/10     | 9/9       | 9/9       |                                          |
| Respiratory frequency                       | 10/10                      | 10/10     | 10/10     | 10/10     | 9/9       | 9/9       |                                          |
| Exophthalmos                                | 10/10                      | 10/10     | 10/10     | 10/10     | 9/9       | 9/9       |                                          |
| Urination                                   | 10/10                      | 10/10     | 10/10     | 10/10     | 9/9       | 9/9       |                                          |
| Salivation                                  | 10/10                      | 10/10     | 10/10     | 10/10     | 9/9       | 9/9       |                                          |
| Piloerection                                | 10/10                      | 10/10     | 10/10     | 10/10     | 9/9       | 9/9       |                                          |
| Diarrheal                                   | 10/10                      | 10/10     | 10/10     | 10/10     | 9/9       | 9/9       |                                          |
| Hypothermia                                 | 10/10                      | 10/10     | 10/10     | 9/10      | 9/9       | 9/9       | Week 4: Female 10 -<br>hypothermic       |

| Mortality: Female 10 (Day 29-week 5)                              |                            |        |        |         |         |         |         |                                               |
|-------------------------------------------------------------------|----------------------------|--------|--------|---------|---------|---------|---------|-----------------------------------------------|
| (MI-ADSC-CS group continuation, weeks 7-13)                       |                            |        |        |         |         |         |         |                                               |
| Studied parameters /<br>Assigned Evaluation                       | Observation period (weeks) |        |        |         |         |         |         | Observations                                  |
|                                                                   | Week 7                     | Week 8 | Week 9 | Week 10 | Week 11 | Week 12 | Week 13 |                                               |
| Visual location                                                   | 9/9                        | 9/9    | 8/8    | 8/8     | 8/8     | 8/8     | 8/8     |                                               |
| Spontaneous activity                                              | 9/9                        | 9/9    | 8/8    | 8/8     | 8/8     | 8/8     | 8/8     |                                               |
| Reactivity                                                        | 9/9                        | 9/9    | 8/8    | 8/8     | 8/8     | 8/8     | 8/8     |                                               |
| Contact response                                                  | 9/9                        | 9/9    | 8/8    | 8/8     | 8/8     | 8/8     | 8/8     |                                               |
| Pain response                                                     | 9/9                        | 9/9    | 8/8    | 8/8     | 8/8     | 8/8     | 8/8     |                                               |
| Fright response                                                   | 9/9                        | 9/9    | 8/8    | 8/8     | 8/8     | 8/8     | 8/8     |                                               |
| Stereotypies                                                      | 9/9                        | 9/9    | 8/8    | 8/8     | 8/8     | 8/8     | 8/8     |                                               |
| Vocalization                                                      | 9/9                        | 9/9    | 8/8    | 8/8     | 8/8     | 8/8     | 8/8     |                                               |
| Passivity                                                         | 9/9                        | 9/9    | 8/8    | 8/8     | 8/8     | 8/8     | 8/8     |                                               |
| Irritability                                                      | 9/9                        | 9/9    | 8/8    | 8/8     | 8/8     | 8/8     | 8/8     |                                               |
| Fear                                                              | 9/9                        | 9/9    | 8/8    | 8/8     | 8/8     | 8/8     | 8/8     |                                               |
| Aisle                                                             | 9/9                        | 9/9    | 8/8    | 8/8     | 8/8     | 8/8     | 8/8     |                                               |
| Corporal position                                                 | 9/9                        | 9/9    | 8/8    | 8/8     | 8/8     | 8/8     | 8/8     |                                               |
| Press strength                                                    | 9/9                        | 9/9    | 8/8    | 8/8     | 8/8     | 8/8     | 8/8     |                                               |
| Corporal tone                                                     | 9/9                        | 9/9    | 8/8    | 8/8     | 8/8     | 8/8     | 8/8     |                                               |
| Members tone                                                      | 9/9                        | 9/9    | 8/8    | 8/8     | 8/8     | 8/8     | 8/8     |                                               |
| Atrium reflection                                                 | 9/9                        | 9/9    | 8/8    | 8/8     | 8/8     | 8/8     | 8/8     |                                               |
| Corneal reflex                                                    | 9/9                        | 9/9    | 8/8    | 8/8     | 8/8     | 8/8     | 8/8     |                                               |
| Ipsilateral reflex                                                | 9/9                        | 9/9    | 8/8    | 8/8     | 8/8     | 8/8     | 8/8     |                                               |
| Balance                                                           | 9/9                        | 9/9    | 8/8    | 8/8     | 8/8     | 8/8     | 8/8     |                                               |
| Straightening reflex                                              | 9/9                        | 9/9    | 8/8    | 8/8     | 8/8     | 8/8     | 8/8     |                                               |
| Temblors                                                          | 9/9                        | 9/9    | 8/8    | 8/8     | 8/8     | 8/8     | 8/8     |                                               |
| Contractions                                                      | 9/9                        | 9/9    | 8/8    | 8/8     | 8/8     | 8/8     | 8/8     |                                               |
| Ataxic march                                                      | 9/9                        | 9/9    | 8/8    | 8/8     | 8/8     | 8/8     | 8/8     |                                               |
| Hypotonic march                                                   | 9/9                        | 9/9    | 8/8    | 8/8     | 8/8     | 8/8     | 8/8     |                                               |
| Pelvic elevation                                                  | 9/9                        | 9/9    | 8/8    | 8/8     | 8/8     | 8/8     | 8/8     |                                               |
| Straub tail                                                       | 9/9                        | 9/9    | 8/8    | 8/8     | 8/8     | 8/8     | 8/8     |                                               |
| Contortions                                                       | 9/9                        | 9/9    | 8/8    | 8/8     | 8/8     | 8/8     | 8/8     |                                               |
| Pupillary size                                                    | 9/9                        | 9/9    | 8/8    | 8/8     | 8/8     | 8/8     | 8/8     |                                               |
| Palpebral opening                                                 | 9/9                        | 9/9    | 8/8    | 8/8     | 8/8     | 8/8     | 8/8     |                                               |
| Skin colour                                                       | 8/9                        | 8/9    | 7/8    | 7/8     | 8/8     | 8/8     | 8/8     | Weeks 7-10:<br>Male 2 - mild<br>skin paleness |
| Cardiac frequency                                                 | 9/9                        | 9/9    | 8/8    | 8/8     | 8/8     | 8/8     | 8/8     |                                               |
| Respiratory frequency                                             | 9/9                        | 9/9    | 8/8    | 8/8     | 8/8     | 8/8     | 8/8     |                                               |
| Exophthalmos                                                      | 9/9                        | 9/9    | 8/8    | 8/8     | 8/8     | 8/8     | 8/8     |                                               |
| Urination                                                         | 8/9                        | 9/9    | 8/8    | 8/8     | 8/8     | 8/8     | 8/8     | Week 7: Female<br>6 - bloody<br>urination     |
| Salivation                                                        | 9/9                        | 9/9    | 8/8    | 8/8     | 8/8     | 8/8     | 8/8     |                                               |
| Piloerection                                                      | 9/9                        | 9/9    | 8/8    | 8/8     | 8/8     | 8/8     | 8/8     |                                               |
| Diarrheal                                                         | 9/9                        | 9/9    | 8/8    | 8/8     | 8/8     | 8/8     | 8/8     |                                               |
| Hypothermia                                                       | 9/9                        | 8/9    | 8/8    | 8/8     | 8/8     | 8/8     | 8/8     | Week 8: Female<br>8 - hypothermic             |
| Mortality: Female 10 (Day 29-week 5) and female 8 (Day 57-week 9) |                            |        |        |         |         |         |         |                                               |

**Table S2.** Irwin`s test for analysing general symptomatology in the MI-CS group. The table shows, for each week, the number of animals in the MI-CS group ( $n = 10$ ; 5 males and 5 females) that present the assigned evaluation. This evaluation corresponds to a normal symptomatology for RH-Foxn1<sup>rnu</sup> rats.

| Studied parameters /<br>Assigned Evaluation | Observation period (weeks) |           |           |           |           |           | Observations                                                                               |
|---------------------------------------------|----------------------------|-----------|-----------|-----------|-----------|-----------|--------------------------------------------------------------------------------------------|
|                                             | Week<br>1                  | Week<br>2 | Week<br>3 | Week<br>4 | Week<br>5 | Week<br>6 |                                                                                            |
| <b>Visual location</b>                      | 10/10                      | 10/10     | 10/10     | 9/9       | 8/8       | 8/8       |                                                                                            |
| <b>Spontaneous activity</b>                 | 10/10                      | 10/10     | 9/10      | 9/9       | 8/8       | 8/8       | Week 3: Female 7 -<br>sporadic and slow<br>movements                                       |
| <b>Reactivity</b>                           | 10/10                      | 10/10     | 10/10     | 9/9       | 8/8       | 8/8       |                                                                                            |
| <b>Contact response</b>                     | 10/10                      | 10/10     | 10/10     | 9/9       | 8/8       | 8/8       |                                                                                            |
| <b>Pain response</b>                        | 10/10                      | 10/10     | 10/10     | 9/9       | 8/8       | 8/8       |                                                                                            |
| <b>Fright response</b>                      | 10/10                      | 10/10     | 10/10     | 9/9       | 8/8       | 8/8       |                                                                                            |
| <b>Stereotypies</b>                         | 10/10                      | 10/10     | 10/10     | 9/9       | 8/8       | 8/8       |                                                                                            |
| <b>Vocalization</b>                         | 10/10                      | 10/10     | 10/10     | 9/9       | 8/8       | 8/8       |                                                                                            |
| <b>Passivity</b>                            | 10/10                      | 10/10     | 10/10     | 9/9       | 8/8       | 8/8       |                                                                                            |
| <b>Irritability</b>                         | 10/10                      | 10/10     | 10/10     | 9/9       | 8/8       | 8/8       |                                                                                            |
| <b>Fear</b>                                 | 10/10                      | 10/10     | 10/10     | 9/9       | 8/8       | 8/8       |                                                                                            |
| <b>Aisle</b>                                | 10/10                      | 10/10     | 10/10     | 9/9       | 8/8       | 8/8       |                                                                                            |
| <b>Corporal position</b>                    | 10/10                      | 10/10     | 10/10     | 9/9       | 8/8       | 8/8       |                                                                                            |
| <b>Press strength</b>                       | 10/10                      | 10/10     | 10/10     | 9/9       | 8/8       | 8/8       |                                                                                            |
| <b>Corporal tone</b>                        | 10/10                      | 10/10     | 10/10     | 9/9       | 8/8       | 8/8       |                                                                                            |
| <b>Members tone</b>                         | 10/10                      | 10/10     | 10/10     | 9/9       | 8/8       | 8/8       |                                                                                            |
| <b>Atrium reflection</b>                    | 10/10                      | 10/10     | 10/10     | 9/9       | 8/8       | 8/8       |                                                                                            |
| <b>Corneal reflex</b>                       | 10/10                      | 10/10     | 10/10     | 9/9       | 8/8       | 8/8       |                                                                                            |
| <b>Ipsilateral reflex</b>                   | 10/10                      | 10/10     | 10/10     | 9/9       | 8/8       | 8/8       |                                                                                            |
| <b>Balance</b>                              | 10/10                      | 10/10     | 9/10      | 9/9       | 8/8       | 8/8       | No carried out in the<br>Female 7 to avoid<br>excessive effort                             |
| <b>Straightening reflex</b>                 | 10/10                      | 10/10     | 9/10      | 9/9       | 8/8       | 8/8       | No carried out in the<br>Female 7 to avoid<br>excessive effort                             |
| <b>Temblors</b>                             | 10/10                      | 10/10     | 10/10     | 9/9       | 8/8       | 8/8       |                                                                                            |
| <b>Contractions</b>                         | 10/10                      | 10/10     | 10/10     | 9/9       | 8/8       | 8/8       |                                                                                            |
| <b>Ataxic march</b>                         | 10/10                      | 10/10     | 10/10     | 9/9       | 8/8       | 8/8       |                                                                                            |
| <b>Hypotonic march</b>                      | 10/10                      | 10/10     | 10/10     | 9/9       | 8/8       | 8/8       |                                                                                            |
| <b>Pelvic elevation</b>                     | 10/10                      | 10/10     | 10/10     | 9/9       | 8/8       | 8/8       |                                                                                            |
| <b>Straub tail</b>                          | 10/10                      | 10/10     | 10/10     | 9/9       | 8/8       | 8/8       |                                                                                            |
| <b>Contortions</b>                          | 10/10                      | 10/10     | 10/10     | 9/9       | 8/8       | 8/8       |                                                                                            |
| <b>Pupillary size</b>                       | 10/10                      | 10/10     | 10/10     | 9/9       | 8/8       | 8/8       |                                                                                            |
| <b>Palpebral opening</b>                    | 10/10                      | 10/10     | 9/10      | 9/9       | 8/8       | 8/8       | Week 3: Female 7 -<br>eyes semi-closed                                                     |
| <b>Skin colour</b>                          | 10/10                      | 10/10     | 10/10     | 9/9       | 8/8       | 8/8       |                                                                                            |
| <b>Cardiac frequency</b>                    | 10/10                      | 10/10     | 9/10      | 9/9       | 8/8       | 8/8       | Week 3: Female 7 -<br>tachycardia                                                          |
| <b>Respiratory frequency</b>                | 10/10                      | 10/10     | 9/10      | 8/9       | 7/8       | 7/8       | Week 3: Female 7 -<br>respiratory distress<br>Week 3-6: Female 8 -<br>respiratory distress |

|                                                                         |       |       |       |     |     |     |
|-------------------------------------------------------------------------|-------|-------|-------|-----|-----|-----|
| <b>Exophthalmos</b>                                                     | 10/10 | 10/10 | 10/10 | 9/9 | 8/8 | 8/8 |
| <b>Urination</b>                                                        | 10/10 | 10/10 | 10/10 | 9/9 | 8/8 | 8/8 |
| <b>Salivation</b>                                                       | 10/10 | 10/10 | 10/10 | 9/9 | 8/8 | 8/8 |
| <b>Piloerection</b>                                                     | 10/10 | 10/10 | 10/10 | 9/9 | 8/8 | 8/8 |
| <b>Diarrheal</b>                                                        | 10/10 | 10/10 | 10/10 | 9/9 | 8/8 | 8/8 |
| <b>Hypothermia</b>                                                      | 10/10 | 10/10 | 10/10 | 9/9 | 8/8 | 8/8 |
| <i>Mortality: Female 7 (Day 24-week 4) and Female 9 (Day 35-week 5)</i> |       |       |       |     |     |     |

(MI-CS group continuation, weeks 7-13)

| Studied parameters /<br>Assigned Evaluation | Observation period (weeks) |        |        |         |         |         |         | Observations                                        |
|---------------------------------------------|----------------------------|--------|--------|---------|---------|---------|---------|-----------------------------------------------------|
|                                             | Week 7                     | Week 8 | Week 9 | Week 10 | Week 11 | Week 12 | Week 13 |                                                     |
| <b>Visual location</b>                      | 8/8                        | 8/8    | 8/8    | 8/8     | 8/8     | 8/8     | 8/8     |                                                     |
| <b>Spontaneous activity</b>                 | 8/8                        | 8/8    | 8/8    | 8/8     | 8/8     | 8/8     | 8/8     |                                                     |
| <b>Reactivity</b>                           | 8/8                        | 8/8    | 8/8    | 8/8     | 8/8     | 8/8     | 8/8     |                                                     |
| <b>Contact response</b>                     | 8/8                        | 8/8    | 8/8    | 8/8     | 8/8     | 8/8     | 8/8     |                                                     |
| <b>Pain response</b>                        | 8/8                        | 8/8    | 8/8    | 8/8     | 8/8     | 8/8     | 8/8     |                                                     |
| <b>Fright response</b>                      | 8/8                        | 8/8    | 8/8    | 8/8     | 8/8     | 8/8     | 8/8     |                                                     |
| <b>Stereotypies</b>                         | 8/8                        | 8/8    | 8/8    | 8/8     | 8/8     | 8/8     | 8/8     |                                                     |
| <b>Vocalization</b>                         | 8/8                        | 8/8    | 8/8    | 8/8     | 8/8     | 8/8     | 8/8     |                                                     |
| <b>Passivity</b>                            | 8/8                        | 8/8    | 8/8    | 8/8     | 8/8     | 8/8     | 8/8     |                                                     |
| <b>Irritability</b>                         | 8/8                        | 8/8    | 8/8    | 8/8     | 8/8     | 8/8     | 8/8     |                                                     |
| <b>Fear</b>                                 | 8/8                        | 8/8    | 8/8    | 8/8     | 8/8     | 8/8     | 8/8     |                                                     |
| <b>Aisle</b>                                | 8/8                        | 8/8    | 8/8    | 8/8     | 8/8     | 8/8     | 8/8     |                                                     |
| <b>Corporal position</b>                    | 8/8                        | 8/8    | 8/8    | 8/8     | 8/8     | 8/8     | 8/8     |                                                     |
| <b>Press strength</b>                       | 8/8                        | 8/8    | 8/8    | 8/8     | 8/8     | 8/8     | 8/8     |                                                     |
| <b>Corporal tone</b>                        | 8/8                        | 8/8    | 8/8    | 8/8     | 8/8     | 8/8     | 8/8     |                                                     |
| <b>Members tone</b>                         | 8/8                        | 8/8    | 8/8    | 8/8     | 8/8     | 8/8     | 8/8     |                                                     |
| <b>Atrium reflection</b>                    | 8/8                        | 8/8    | 8/8    | 8/8     | 8/8     | 8/8     | 8/8     |                                                     |
| <b>Corneal reflex</b>                       | 8/8                        | 8/8    | 8/8    | 8/8     | 8/8     | 8/8     | 8/8     |                                                     |
| <b>Ipsilateral reflex</b>                   | 8/8                        | 8/8    | 8/8    | 8/8     | 8/8     | 8/8     | 8/8     |                                                     |
| <b>Balance</b>                              | 8/8                        | 8/8    | 8/8    | 8/8     | 8/8     | 8/8     | 8/8     |                                                     |
| <b>Straightening reflex</b>                 | 8/8                        | 8/8    | 8/8    | 8/8     | 8/8     | 8/8     | 8/8     |                                                     |
| <b>Temblors</b>                             | 8/8                        | 8/8    | 8/8    | 8/8     | 8/8     | 8/8     | 8/8     |                                                     |
| <b>Contractions</b>                         | 8/8                        | 8/8    | 8/8    | 8/8     | 8/8     | 8/8     | 8/8     |                                                     |
| <b>Ataxic march</b>                         | 8/8                        | 8/8    | 8/8    | 8/8     | 8/8     | 8/8     | 8/8     |                                                     |
| <b>Hypotonic march</b>                      | 8/8                        | 8/8    | 8/8    | 8/8     | 8/8     | 8/8     | 8/8     |                                                     |
| <b>Pelvic elevation</b>                     | 8/8                        | 8/8    | 8/8    | 8/8     | 8/8     | 8/8     | 8/8     |                                                     |
| <b>Straub tail</b>                          | 8/8                        | 8/8    | 8/8    | 8/8     | 8/8     | 8/8     | 8/8     |                                                     |
| <b>Contortions</b>                          | 8/8                        | 8/8    | 8/8    | 8/8     | 8/8     | 8/8     | 8/8     |                                                     |
| <b>Pupillary size</b>                       | 8/8                        | 8/8    | 8/8    | 8/8     | 8/8     | 8/8     | 8/8     |                                                     |
| <b>Palpebral opening</b>                    | 8/8                        | 8/8    | 8/8    | 8/8     | 8/8     | 8/8     | 8/8     |                                                     |
| <b>Skin colour</b>                          | 8/8                        | 8/8    | 8/8    | 8/8     | 8/8     | 8/8     | 8/8     |                                                     |
| <b>Cardiac frequency</b>                    | 8/8                        | 8/8    | 8/8    | 8/8     | 8/8     | 8/8     | 8/8     |                                                     |
| <b>Respiratory frequency</b>                | 7/8                        | 7/8    | 7/8    | 7/8     | 7/8     | 7/8     | 8/8     | Week 7-12:<br>Female 8 -<br>respiratory<br>distress |
| <b>Exophthalmos</b>                         | 8/8                        | 8/8    | 8/8    | 8/8     | 8/8     | 8/8     | 8/8     |                                                     |
| <b>Urination</b>                            | 8/8                        | 8/8    | 8/8    | 8/8     | 8/8     | 8/8     | 8/8     |                                                     |
| <b>Salivation</b>                           | 8/8                        | 8/8    | 8/8    | 8/8     | 8/8     | 8/8     | 8/8     |                                                     |

|                                                                         |     |     |     |     |     |     |     |
|-------------------------------------------------------------------------|-----|-----|-----|-----|-----|-----|-----|
| <b>Piloerection</b>                                                     | 8/8 | 8/8 | 8/8 | 8/8 | 8/8 | 8/8 | 8/8 |
| <b>Diarrheal</b>                                                        | 8/8 | 8/8 | 8/8 | 8/8 | 8/8 | 8/8 | 8/8 |
| <b>Hypothermia</b>                                                      | 8/8 | 8/8 | 8/8 | 8/8 | 8/8 | 8/8 | 8/8 |
| <i>Mortality: Female 7 (Day 24-week 4) and Female 9 (Day 35-week 5)</i> |     |     |     |     |     |     |     |

**Table S3.** Irwin`s test for analysing general symptomatology in the Sham-ADSC-CS group. The table shows, for each week, the number of animals in the Sham-ADSC-CS group ( $n = 10$ ; 5 males and 5 females) that present the assigned evaluation. This evaluation corresponds to a normal symptomatology for RH-Foxn1<sup>rnu</sup> rats.

| Studied parameters /<br>Assigned Evaluation | Observation period (weeks) |           |           |           |           |           | Observations |
|---------------------------------------------|----------------------------|-----------|-----------|-----------|-----------|-----------|--------------|
|                                             | Week<br>1                  | Week<br>2 | Week<br>3 | Week<br>4 | Week<br>5 | Week<br>6 |              |
| <b>Visual location</b>                      | 10/10                      | 10/10     | 10/10     | 10/10     | 9/9       | 8/8       |              |
| <b>Spontaneous activity</b>                 | 10/10                      | 10/10     | 10/10     | 10/10     | 9/9       | 8/8       |              |
| <b>Reactivity</b>                           | 10/10                      | 10/10     | 10/10     | 10/10     | 9/9       | 8/8       |              |
| <b>Contact response</b>                     | 10/10                      | 10/10     | 10/10     | 10/10     | 9/9       | 8/8       |              |
| <b>Pain response</b>                        | 10/10                      | 10/10     | 10/10     | 10/10     | 9/9       | 8/8       |              |
| <b>Fright response</b>                      | 10/10                      | 10/10     | 10/10     | 10/10     | 9/9       | 8/8       |              |
| <b>Stereotypies</b>                         | 10/10                      | 10/10     | 10/10     | 10/10     | 9/9       | 8/8       |              |
| <b>Vocalization</b>                         | 10/10                      | 10/10     | 10/10     | 10/10     | 9/9       | 8/8       |              |
| <b>Passivity</b>                            | 10/10                      | 10/10     | 10/10     | 10/10     | 9/9       | 8/8       |              |
| <b>Irritability</b>                         | 10/10                      | 10/10     | 10/10     | 10/10     | 9/9       | 8/8       |              |
| <b>Fear</b>                                 | 10/10                      | 10/10     | 10/10     | 10/10     | 9/9       | 8/8       |              |
| <b>Aisle</b>                                | 10/10                      | 10/10     | 10/10     | 10/10     | 9/9       | 8/8       |              |
| <b>Corporal position</b>                    | 10/10                      | 10/10     | 10/10     | 10/10     | 9/9       | 8/8       |              |
| <b>Press strength</b>                       | 10/10                      | 10/10     | 10/10     | 10/10     | 9/9       | 8/8       |              |
| <b>Corporal tone</b>                        | 10/10                      | 10/10     | 10/10     | 10/10     | 9/9       | 8/8       |              |
| <b>Members tone</b>                         | 10/10                      | 10/10     | 10/10     | 10/10     | 9/9       | 8/8       |              |
| <b>Atrium reflection</b>                    | 10/10                      | 10/10     | 10/10     | 10/10     | 9/9       | 8/8       |              |
| <b>Corneal reflex</b>                       | 10/10                      | 10/10     | 10/10     | 10/10     | 9/9       | 8/8       |              |
| <b>Ipsilateral reflex</b>                   | 10/10                      | 10/10     | 10/10     | 10/10     | 9/9       | 8/8       |              |
| <b>Balance</b>                              | 10/10                      | 10/10     | 10/10     | 10/10     | 9/9       | 8/8       |              |
| <b>Straightening reflex</b>                 | 10/10                      | 10/10     | 10/10     | 10/10     | 9/9       | 8/8       |              |
| <b>Temblors</b>                             | 10/10                      | 10/10     | 10/10     | 10/10     | 9/9       | 8/8       |              |
| <b>Contractions</b>                         | 10/10                      | 10/10     | 10/10     | 10/10     | 9/9       | 8/8       |              |
| <b>Ataxic march</b>                         | 10/10                      | 10/10     | 10/10     | 10/10     | 9/9       | 8/8       |              |
| <b>Hypotonic march</b>                      | 10/10                      | 10/10     | 10/10     | 10/10     | 9/9       | 8/8       |              |
| <b>Pelvic elevation</b>                     | 10/10                      | 10/10     | 10/10     | 10/10     | 9/9       | 8/8       |              |
| <b>Straub tail</b>                          | 10/10                      | 10/10     | 10/10     | 10/10     | 9/9       | 8/8       |              |
| <b>Contortions</b>                          | 10/10                      | 10/10     | 10/10     | 10/10     | 9/9       | 8/8       |              |
| <b>Pupillary size</b>                       | 10/10                      | 10/10     | 10/10     | 10/10     | 9/9       | 8/8       |              |
| <b>Palpebral opening</b>                    | 10/10                      | 10/10     | 10/10     | 10/10     | 9/9       | 8/8       |              |
| <b>Skin colour</b>                          | 10/10                      | 10/10     | 10/10     | 10/10     | 9/9       | 8/8       |              |
| <b>Cardiac frequency</b>                    | 10/10                      | 10/10     | 10/10     | 10/10     | 9/9       | 8/8       |              |
| <b>Respiratory frequency</b>                | 10/10                      | 10/10     | 10/10     | 10/10     | 9/9       | 8/8       |              |
| <b>Exophthalmos</b>                         | 10/10                      | 10/10     | 10/10     | 10/10     | 9/9       | 8/8       |              |
| <b>Urination</b>                            | 10/10                      | 10/10     | 10/10     | 10/10     | 9/9       | 8/8       |              |
| <b>Salivation</b>                           | 10/10                      | 10/10     | 10/10     | 10/10     | 9/9       | 8/8       |              |

|                                                                            |       |       |       |       |     |     |                                                                |
|----------------------------------------------------------------------------|-------|-------|-------|-------|-----|-----|----------------------------------------------------------------|
| <b>Piloerection</b>                                                        | 10/10 | 10/10 | 10/10 | 10/10 | 9/9 | 8/8 |                                                                |
| <b>Diarrheal</b>                                                           | 10/10 | 10/10 | 10/10 | 10/10 | 8/9 | 8/8 | Week 4: Male 4 - diarrhea                                      |
| <b>Hypothermia</b>                                                         | 10/10 | 10/10 | 10/10 | 10/10 | 8/9 | 7/8 | Week 5: Male 4 - hypothermia<br>Week 6: Female 8 - hypothermia |
| <b><i>Mortality: Male 5 (Day 28-week 5) and Male 4 (Day 41-week 6)</i></b> |       |       |       |       |     |     |                                                                |

(Sham-ADSC-CS group continuation, weeks 7-13)

| Studied parameters /<br>Assigned Evaluation | Observation period (weeks) |        |        |         |         |         |         | Observations |
|---------------------------------------------|----------------------------|--------|--------|---------|---------|---------|---------|--------------|
|                                             | Week 7                     | Week 8 | Week 9 | Week 10 | Week 11 | Week 12 | Week 13 |              |
| <b>Visual location</b>                      | 8/8                        | 8/8    | 8/8    | 7/7     | 7/7     | 7/7     | 7/7     |              |
| <b>Spontaneous activity</b>                 | 8/8                        | 8/8    | 8/8    | 7/7     | 7/7     | 7/7     | 7/7     |              |
| <b>Reactivity</b>                           | 8/8                        | 8/8    | 8/8    | 7/7     | 7/7     | 7/7     | 7/7     |              |
| <b>Contact response</b>                     | 8/8                        | 8/8    | 8/8    | 7/7     | 7/7     | 7/7     | 7/7     |              |
| <b>Pain response</b>                        | 8/8                        | 8/8    | 8/8    | 7/7     | 7/7     | 7/7     | 7/7     |              |
| <b>Fright response</b>                      | 8/8                        | 8/8    | 8/8    | 7/7     | 7/7     | 7/7     | 7/7     |              |
| <b>Stereotypies</b>                         | 8/8                        | 8/8    | 8/8    | 7/7     | 7/7     | 7/7     | 7/7     |              |
| <b>Vocalization</b>                         | 8/8                        | 8/8    | 8/8    | 7/7     | 7/7     | 7/7     | 7/7     |              |
| <b>Passivity</b>                            | 8/8                        | 8/8    | 8/8    | 7/7     | 7/7     | 7/7     | 7/7     |              |
| <b>Irritability</b>                         | 8/8                        | 8/8    | 8/8    | 7/7     | 7/7     | 7/7     | 7/7     |              |
| <b>Fear</b>                                 | 8/8                        | 8/8    | 8/8    | 7/7     | 7/7     | 7/7     | 7/7     |              |
| <b>Aisle</b>                                | 8/8                        | 8/8    | 8/8    | 7/7     | 7/7     | 7/7     | 7/7     |              |
| <b>Corporal position</b>                    | 8/8                        | 8/8    | 8/8    | 7/7     | 7/7     | 7/7     | 7/7     |              |
| <b>Press strength</b>                       | 8/8                        | 8/8    | 8/8    | 7/7     | 7/7     | 7/7     | 7/7     |              |
| <b>Corporal tone</b>                        | 8/8                        | 8/8    | 8/8    | 7/7     | 7/7     | 7/7     | 7/7     |              |
| <b>Members tone</b>                         | 8/8                        | 8/8    | 8/8    | 7/7     | 7/7     | 7/7     | 7/7     |              |
| <b>Atrium reflection</b>                    | 8/8                        | 8/8    | 8/8    | 7/7     | 7/7     | 7/7     | 7/7     |              |
| <b>Corneal reflex</b>                       | 8/8                        | 8/8    | 8/8    | 7/7     | 7/7     | 7/7     | 7/7     |              |
| <b>Ipsilateral reflex</b>                   | 8/8                        | 8/8    | 8/8    | 7/7     | 7/7     | 7/7     | 7/7     |              |
| <b>Balance</b>                              | 8/8                        | 8/8    | 8/8    | 7/7     | 7/7     | 7/7     | 7/7     |              |
| <b>Straightening reflex</b>                 | 8/8                        | 8/8    | 8/8    | 7/7     | 7/7     | 7/7     | 7/7     |              |
| <b>Temblors</b>                             | 8/8                        | 8/8    | 8/8    | 7/7     | 7/7     | 7/7     | 7/7     |              |
| <b>Contractions</b>                         | 8/8                        | 8/8    | 8/8    | 7/7     | 7/7     | 7/7     | 7/7     |              |
| <b>Ataxic march</b>                         | 8/8                        | 8/8    | 8/8    | 7/7     | 7/7     | 7/7     | 7/7     |              |
| <b>Hypotonic march</b>                      | 8/8                        | 8/8    | 8/8    | 7/7     | 7/7     | 7/7     | 7/7     |              |
| <b>Pelvic elevation</b>                     | 8/8                        | 8/8    | 8/8    | 7/7     | 7/7     | 7/7     | 7/7     |              |
| <b>Straub tail</b>                          | 8/8                        | 8/8    | 8/8    | 7/7     | 7/7     | 7/7     | 7/7     |              |
| <b>Contortions</b>                          | 8/8                        | 8/8    | 8/8    | 7/7     | 7/7     | 7/7     | 7/7     |              |
| <b>Pupillary size</b>                       | 8/8                        | 8/8    | 8/8    | 7/7     | 7/7     | 7/7     | 7/7     |              |
| <b>Palpebral opening</b>                    | 8/8                        | 8/8    | 8/8    | 7/7     | 7/7     | 7/7     | 7/7     |              |
| <b>Skin colour</b>                          | 8/8                        | 8/8    | 8/8    | 7/7     | 7/7     | 7/7     | 7/7     |              |
| <b>Cardiac frequency</b>                    | 8/8                        | 8/8    | 8/8    | 7/7     | 7/7     | 7/7     | 7/7     |              |
| <b>Respiratory frequency</b>                | 8/8                        | 8/8    | 8/8    | 7/7     | 7/7     | 7/7     | 7/7     |              |
| <b>Exophthalmos</b>                         | 8/8                        | 8/8    | 8/8    | 7/7     | 7/7     | 7/7     | 7/7     |              |
| <b>Urination</b>                            | 8/8                        | 8/8    | 8/8    | 7/7     | 7/7     | 7/7     | 7/7     |              |
| <b>Salivation</b>                           | 8/8                        | 8/8    | 8/8    | 7/7     | 7/7     | 7/7     | 7/7     |              |
| <b>Piloerection</b>                         | 8/8                        | 8/8    | 8/8    | 7/7     | 7/7     | 7/7     | 7/7     |              |
| <b>Diarrheal</b>                            | 8/8                        | 8/8    | 8/8    | 7/7     | 7/7     | 7/7     | 7/7     |              |



|                                                                                                      |     |     |     |     |     |     |     |
|------------------------------------------------------------------------------------------------------|-----|-----|-----|-----|-----|-----|-----|
| <b>Hypothermia</b>                                                                                   | 8/8 | 8/8 | 8/8 | 7/7 | 7/7 | 7/7 | 7/7 |
| <b>Mortality: Male 5 (Day 28-week 5); Male 4 (Day 41-week 6) and Male Reserve 1 (Day 65-week 10)</b> |     |     |     |     |     |     |     |

**Table S4.** Irwin`s test for analysing general symptomatology in the Sham Group. The table shows, for each week, the number of animals in the Sham group ( $n = 10$ ; 5 males and 5 females) that present the assigned evaluation. This evaluation corresponds to a normal symptomatology for RH-Foxn1<sup>rnu</sup> rats.

| Studied parameters /<br>Assigned Evaluation | Observation period (weeks) |           |           |           |           |           | Observations |
|---------------------------------------------|----------------------------|-----------|-----------|-----------|-----------|-----------|--------------|
|                                             | Week<br>1                  | Week<br>2 | Week<br>3 | Week<br>4 | Week<br>5 | Week<br>6 |              |
| <b>Visual location</b>                      | 10/10                      | 10/10     | 10/10     | 10/10     | 10/10     | 10/10     |              |
| <b>Spontaneous activity</b>                 | 10/10                      | 10/10     | 10/10     | 10/10     | 10/10     | 10/10     |              |
| <b>Reactivity</b>                           | 10/10                      | 10/10     | 10/10     | 10/10     | 10/10     | 10/10     |              |
| <b>Contact response</b>                     | 10/10                      | 10/10     | 10/10     | 10/10     | 10/10     | 10/10     |              |
| <b>Pain response</b>                        | 10/10                      | 10/10     | 10/10     | 10/10     | 10/10     | 10/10     |              |
| <b>Fright response</b>                      | 10/10                      | 10/10     | 10/10     | 10/10     | 10/10     | 10/10     |              |
| <b>Stereotypies</b>                         | 10/10                      | 10/10     | 10/10     | 10/10     | 10/10     | 10/10     |              |
| <b>Vocalization</b>                         | 10/10                      | 10/10     | 10/10     | 10/10     | 10/10     | 10/10     |              |
| <b>Passivity</b>                            | 10/10                      | 10/10     | 10/10     | 10/10     | 10/10     | 10/10     |              |
| <b>Irritability</b>                         | 10/10                      | 10/10     | 10/10     | 10/10     | 10/10     | 10/10     |              |
| <b>Fear</b>                                 | 10/10                      | 10/10     | 10/10     | 10/10     | 10/10     | 10/10     |              |
| <b>Aisle</b>                                | 10/10                      | 10/10     | 10/10     | 10/10     | 10/10     | 10/10     |              |
| <b>Corporal position</b>                    | 10/10                      | 10/10     | 10/10     | 10/10     | 10/10     | 10/10     |              |
| <b>Press strength</b>                       | 10/10                      | 10/10     | 10/10     | 10/10     | 10/10     | 10/10     |              |
| <b>Corporal tone</b>                        | 10/10                      | 10/10     | 10/10     | 10/10     | 10/10     | 10/10     |              |
| <b>Members tone</b>                         | 10/10                      | 10/10     | 10/10     | 10/10     | 10/10     | 10/10     |              |
| <b>Atrium reflection</b>                    | 10/10                      | 10/10     | 10/10     | 10/10     | 10/10     | 10/10     |              |
| <b>Corneal reflex</b>                       | 10/10                      | 10/10     | 10/10     | 10/10     | 10/10     | 10/10     |              |
| <b>Ipsilateral reflex</b>                   | 10/10                      | 10/10     | 10/10     | 10/10     | 10/10     | 10/10     |              |
| <b>Balance</b>                              | 10/10                      | 10/10     | 10/10     | 10/10     | 10/10     | 10/10     |              |
| <b>Straightening reflex</b>                 | 10/10                      | 10/10     | 10/10     | 10/10     | 10/10     | 10/10     |              |
| <b>Temblors</b>                             | 10/10                      | 10/10     | 10/10     | 10/10     | 10/10     | 10/10     |              |
| <b>Contractions</b>                         | 10/10                      | 10/10     | 10/10     | 10/10     | 10/10     | 10/10     |              |
| <b>Ataxic march</b>                         | 10/10                      | 10/10     | 10/10     | 10/10     | 10/10     | 10/10     |              |
| <b>Hypotonic march</b>                      | 10/10                      | 10/10     | 10/10     | 10/10     | 10/10     | 10/10     |              |
| <b>Pelvic elevation</b>                     | 10/10                      | 10/10     | 10/10     | 10/10     | 10/10     | 10/10     |              |
| <b>Straub tail</b>                          | 10/10                      | 10/10     | 10/10     | 10/10     | 10/10     | 10/10     |              |
| <b>Contortions</b>                          | 10/10                      | 10/10     | 10/10     | 10/10     | 10/10     | 10/10     |              |
| <b>Pupillary size</b>                       | 10/10                      | 10/10     | 10/10     | 10/10     | 10/10     | 10/10     |              |
| <b>Palpebral opening</b>                    | 10/10                      | 10/10     | 10/10     | 10/10     | 10/10     | 10/10     |              |
| <b>Skin colour</b>                          | 10/10                      | 10/10     | 10/10     | 10/10     | 10/10     | 10/10     |              |
| <b>Cardiac frequency</b>                    | 10/10                      | 10/10     | 10/10     | 10/10     | 10/10     | 10/10     |              |
| <b>Respiratory frequency</b>                | 10/10                      | 10/10     | 10/10     | 10/10     | 10/10     | 10/10     |              |
| <b>Exophthalmos</b>                         | 10/10                      | 10/10     | 10/10     | 10/10     | 10/10     | 10/10     |              |
| <b>Urination</b>                            | 10/10                      | 10/10     | 10/10     | 10/10     | 10/10     | 10/10     |              |
| <b>Salivation</b>                           | 10/10                      | 10/10     | 10/10     | 10/10     | 10/10     | 10/10     |              |
| <b>Piloerection</b>                         | 10/10                      | 10/10     | 10/10     | 10/10     | 10/10     | 10/10     |              |



**Table S5.** Serum biochemistry in male rats. Ordered by experimental group, the descriptive statistics of centralization and dispersion (mean and standard deviation) and the statistical significance obtained by the one-way non-parametric ANOVA (Kruskal-Wallis test, according to the levels of significance: (\*)  $p < 0.05$  and (\*\*)  $p < 0.01$  are included). MI-ADSC-CS, MI-CS and Sham-ADSC-CS vs. Sham control group. Analysis was performed in 3 animals per each experimental group and sex for day 2 and 10 post-implant, and in 5 animals for day 28 and 90 post-implant.

| MALE         | Time of analysis | Albumin (g/dl) | Urea (mg/dl) | AST (U/l) | ALT (U/l) | ALP (U/l) | T. Bilirubin (mg/dl) | Cholesterol (mg/dl) | Glucose (mg/ml) | Creatinine (mg/dl) | T. Proteins (g/dl) | CPK (U/l)  | GGT (U/l) | Chloro (mmol/l) | Potassium (mmol/l) | Sodium (mmol/l) | Globuline (g/dl) |
|--------------|------------------|----------------|--------------|-----------|-----------|-----------|----------------------|---------------------|-----------------|--------------------|--------------------|------------|-----------|-----------------|--------------------|-----------------|------------------|
| MI-ADSC-CS   | Day 2            | 3.1 ± 0.1      | 36 ± 5       | 195 ± 8   | 35 ± 2    | 81 ± 12   | 0.09 ± 0.01          | 74 ± 4              | 97 ± 9          | 0.30 ± 0.02        | 5.2 ± 0.2          | 1058 ± 474 | 0 ± 0     | 96.4 ± 0.9      | 4.33 ± .05         | 132 ± 5         | 2.1 ± 0.2        |
|              | Day 10           | 3.2 ± 0.2      | 34 ± 6       | 101 ± 17  | 16 ± 2    | 58 ± 4    | 0.09 ± 0.01          | 69 ± 5              | 66 ± 13         | 0.34 ± 0.06        | 4.9 ± 0.4          | 604 ± 155  | 0 ± 0     | 98.6 ± 5.8      | 4.44 ± 0.23        | 140 ± 11        | 1.7 ± 0.2        |
|              | Day 28           | 3.7 ± 0.1      | 31 ± 5       | 72 ± 2    | 31 ± 5    | 78 ± 2    | 0.10 ± 0.02          | 92 ± 1              | 189 ± 9         | 0.35 ± 0.04        | 5.7 ± 0.1          | 345 ± 95   | 0 ± 0     | 92.9 ± 1.3      | 4.75 ± 0.21        | 142 ± 1(*)      | 2.0 ± 0.1        |
|              | Day 90           | 3.6 ± 0.2      | 37 ± 5       | 96 ± 8    | 21 ± 3    | 51 ± 11   | 0.08 ± 0.01          | 89 ± 8              | 107 ± 13        | 0.39 ± 0.02        | 5.3 ± 0.4          | 529 ± 201  | 0 ± 0     | 90.9 ± 1.2      | 4.32 ± 0.27        | 126 ± 2         | 1.7 ± 0.3        |
| MI-CS        | Day 2            | 3.3 ± 0.1      | 37 ± 2       | 108 ± 13  | 19 ± 3    | 78 ± 10   | 0.09 ± 0.01          | 78 ± 6              | 107 ± 13        | 0.36 ± 0.03        | 5.6 ± 0.1          | 537 ± 128  | 0 ± 0     | 93.3 ± 1.1      | 4.19 ± 0.12        | 115 ± 11(*)     | 2.2 ± 0.1        |
|              | Day 10           | 3.6 ± 0.2      | 37 ± 3       | 82 ± 8    | 17 ± 3    | 66 ± 4    | 0.10 ± 0.01          | 78 ± 10             | 113 ± 14        | 0.35 ± 0.03        | 5.2 ± 0.1          | 412 ± 102  | 0 ± 0     | 98.8 ± 5.8      | 4.28 ± 0.18        | 136 ± 9         | 1.6 ± 0.1        |
|              | Day 28           | 3.5 ± 0.1      | 25 ± 2       | 70 ± 9    | 32 ± 7    | 70 ± 12   | 0.08 ± 0.01          | 87 ± 9              | 223 ± 29        | 0.34 ± 0.03        | 5.4 ± 0.1          | 309 ± 53   | 0 ± 0     | 94.7 ± 0.2(**)  | 4.45 ± 0.39        | 146 ± 6(*)      | 1.9 ± 0          |
|              | Day 90           | 3.8 ± 0.1      | 36 ± 2       | 82 ± 23   | 21 ± 2    | 51 ± 9    | 0.10 ± 0.02(**)      | 92 ± 8              | 120 ± 11        | 0.40 ± 0.03        | 5.6 ± 0.2          | 541 ± 454  | 0 ± 0     | 89.2 ± 4.9      | 3.93 ± 0.40        | 120 ± 9         | 1.8 ± 0          |
| Sham-ADSC-CS | Day 2            | 3.1 ± 0.2      | 44 ± 6       | 183 ± 36  | 33 ± 7    | 85 ± 41   | 0.12 ± 0.04          | 92 ± 16             | 127 ± 12        | 0.37 ± 0.03        | 5.4 ± 0.2          | 1291 ± 685 | 1 ± 1     | 89.0 ± 0.6(*)   | 3.99 ± 0.22        | 128 ± 4         | 2.3 ± 0.1        |
|              | Day 10           | 3.6 ± 0.4      | 32 ± 4       | 107 ± 8   | 21 ± 2    | 59 ± 5    | 0.10 ± 0.03          | 82 ± 4              | 101 ± 26        | 0.35 ± 0.04        | 5.3 ± 0.3          | 830 ± 462  | 0 ± 0     | 99.8 ± 0.8      | 4.48 ± 0.42        | 139 ± 1         | 1.7 ± 0.2        |
|              | Day 28           | 3.5 ± 0.2      | 30 ± 6       | 81 ± 27   | 39 ± 21   | 65 ± 13   | 0.11 ± 0.02          | 93 ± 7              | 208 ± 28        | 0.30 ± 0.04        | 5.2 ± 0.2          | 337 ± 184  | 0 ± 0     | 91.0 ± 0.8      | 4.45 ± 0.25        | 131 ± 2         | 1.7 ± 0(*)       |
|              | Day 90           | 3.7 ± 0.1      | 35 ± 6       | 80 ± 29   | 17 ± 4    | 41 ± 3    | 0.04 ± 0.01          | 83 ± 0              | 132 ± 16        | 0.37 ± 0.04        | 5.5 ± 0.1          | 757 ± 710  | 0 ± 0     | 92.1 ± 2.6      | 4.04 ± 0.11        | 135 ± 4         | 1.8 ± 0          |
| Sham         | Day 2            | 3.1 ± 0.3      | 38 ± 3       | 129 ± 40  | 38 ± 21   | 59 ± 5    | 0.12 ± 0.02          | 85 ± 19             | 116 ± 5         | 0.30 ± 0.02        | 5.1 ± 0.5          | 916 ± 885  | 0 ± 0     | 100.0 ± 0.5     | 4.56 ± 0.44        | 139 ± 1         | 2.1 ± 0.2        |
|              | Day 10           | 3.7 ± 0.1      | 34 ± 6       | 107 ± 12  | 22 ± 2    | 56 ± 6    | 0.11 ± 0.01          | 77 ± 7              | 106 ± 3         | 0.38 ± 0.02        | 5.3 ± 0.2          | 379 ± 127  | 0 ± 0     | 98.2 ± 0.3      | 4.72 ± 0.21        | 124 ± 26        | 1.6 ± 0.2        |
|              | Day 28           | 3.6 ± 0.1      | 32 ± 3       | 122 ± 20  | 48 ± 13   | 64 ± 13   | 0.07 ± 0.01          | 78 ± 5              | 194 ± 32        | 0.29 ± 0.02        | 5.5 ± 0.1          | 520 ± 375  | 0 ± 0     | 87.3 ± 0.8      | 4.64 ± 0.21        | 127 ± 2         | 1.9 ± 0          |
|              | Day 90           | 3.9 ± 0.4      | 37 ± 9       | 96 ± 17   | 20 ± 7    | 43 ± 6    | 0.03 ± 0.02          | 90 ± 8              | 127 ± 34        | 0.41 ± 0.06        | 5.9 ± 0.7          | 694 ± 675  | 1 ± 2     | 93.0 ± 6.6      | 4.39 ± 0.38        | 143 ± 18        | 2.1 ± 0.5        |

**Table S6.** Serum biochemistry in female rats. Ordered by experimental group, the descriptive statistics of centralization and dispersion (mean and standard deviation) and the statistical significance obtained by the one-way non-parametric ANOVA (Kruskal-Wallis test, according to the levels of significance: (\*)  $p < 0.05$  and (\*\*)  $p < 0.01$  are included). MI-ADSC-CS, MI-CS and Sham-ADSC-CS vs. Sham control group. Analysis was performed in 3 animals per each experimental group and sex for day 2 and 10 post-implant and in 5 animals for day 28 and 90 post-implant.

| FEMALE       | Time of analysis | Albumin (g/dl) | Urea (mg/dl) | AST (U/l)    | ALT (U/l) | ALP (U/l)  | T. Bilirubin (mg/dl) | Cholesterol (mg/dl) | Glucose (mg/ml) | Creatinine (mg/dl) | T. Proteins (g/dl) | CPK (U/l) | GGT (U/l) | Chloro (mmol/l) | Potassium (mmol/l) | Sodium (mmol/l) | Globulin (g/dl) |
|--------------|------------------|----------------|--------------|--------------|-----------|------------|----------------------|---------------------|-----------------|--------------------|--------------------|-----------|-----------|-----------------|--------------------|-----------------|-----------------|
| MI-ADSC-CS   | Day 2            | 2.7 ± 0.2      | 37 ± 2       | 180 ± 22     | 33 ± 7    | 54 ± 3     | 0.11 ± 0.03          | 65 ± 7              | 75 ± 5(*)       | 0.30 ± 0.05        | 4.5 ± 0.4          | 690 ± 179 | 0 ± 0     | 98.5 ± 1.0      | 4.39 ± 0.16        | 136 ± 10        | 1.8 ± 0.2       |
|              | Day 10           | 3.3 ± 0.3      | 48 ± 12      | 118 ± 9      | 16 ± 3    | 37 ± 6     | 0.09 ± 0             | 74 ± 13             | 70 ± 7          | 0.35 ± 0.03        | 4.6 ± 0.3          | 670 ± 156 | 0 ± 0     | 98.0 ± 4.0      | 4.71 ± 0.42        | 134 ± 4         | 1.8 ± 0.2       |
|              | Day 28           | 4.1 ± 0.1      | 47 ± 4       | 79 ± 7       | 20 ± 5    | 46 ± 1     | 0.06 ± 0             | 93 ± 4              | 102 ± 26        | 0.41 ± 0.04        | 5.6 ± 0.1          | 433 ± 37  | 0 ± 0     | 100.4 ± 0.4(*)  | 4.09 ± 0.41        | 147 ± 2         | 1.5 ± 0.0       |
|              | Day 90           | 3.9 ± 0.3      | 46 ± 4       | 97 ± 16      | 17 ± 3(*) | 37 ± 8(*)  | 0.12 ± 0.03          | 92 ± 19             | 92 ± 4          | 0.41 ± 0.06        | 5 ± 0.3            | 522 ± 144 | 0 ± 0     | 99.3 ± 2.2      | 4.80 ± 0.17        | 133 ± 1         | 1.6 ± 0.4       |
| MI-CS        | Day 2            | 3.2 ± 0.5      | 43 ± 8       | 117 ± 20     | 18 ± 1(*) | 45 ± 4     | 0.08 ± 0.01          | 87 ± 20             | 88 ± 2          | 0.33 ± 0.06        | 5.1 ± 0.6          | 406 ± 157 | 0 ± 0     | 93.9 ± 0.2      | 4.26 ± 0.27        | 130 ± 11        | 1.9 ± 0.2       |
|              | Day 10           | 3.7 ± 0.3      | 47 ± 9       | 65 ± 6       | 12 ± 1    | 39 ± 1     | 0.06 ± 0.01          | 98 ± 15             | 95 ± 6          | 0.41 ± 0.05        | 5.2 ± 0.4          | 216 ± 87  | 0 ± 0     | 96.3 ± 1.4      | 4.01 ± 0.07        | 132 ± 3(*)      | 1.4 ± 0.1       |
|              | Day 28           | 3.9 ± 0.4      | 46 ± 10      | 131 ± 102    | 46 ± 56   | 77 ± 36    | 0.11 ± 0.06          | 107 ± 21            | 166 ± 164       | 0.43 ± 0.04(*)     | 6 ± 0.3            | 268 ± 37  | 3 ± 6(*)  | 97 ± 4.7(*)     | 4.34 ± 0.06        | 150 ± 6(*)      | 1.8 ± 0.1(*)    |
|              | Day 90           | 3.9 ± 0.3      | 38 ± 3       | 90 ± 20      | 21 ± 6(*) | 33 ± 15(*) | 0.15 ± 0.04(*)       | 98 ± 14             | 119 ± 33        | 0.43 ± 0.01        | 5.4 ± 0.5          | 391 ± 37  | 1 ± 2     | 100 ± 0.8       | 3.62 ± 0.55        | 134 ± 1         | 1.5 ± 0.2       |
| Sham-ADSC-CS | Day 2            | 3.2 ± 0.5      | 43 ± 6       | 166 ± 9      | 27 ± 2    | 53 ± 14    | 0.10 ± 0.03          | 83 ± 6              | 104 ± 20        | 0.26 ± 0.03        | 4.9 ± 0.6          | 718 ± 231 | 1 ± 2     | 92.1 ± 0.4(*)   | 3.68 ± 0.13        | 130 ± 2         | 1.7 ± 0.2       |
|              | Day 10           | 3.5 ± 0.2      | 49 ± 2       | 95 ± 10      | 14 ± 2    | 38 ± 3     | 0.09 ± 0.01          | 78 ± 3              | 84 ± 16         | 0.39 ± 0.06        | 5.0 ± 0.2          | 525 ± 180 | 0 ± 0     | 101.9 ± 0.7     | 4.38 ± 0.20        | 137 ± 3         | 1.5 ± 0.0       |
|              | Day 28           | 3.8 ± 0.2      | 32 ± 5       | 92 ± 14      | 29 ± 3    | 42 ± 3     | 0.08 ± 0.03          | 88 ± 10             | 197 ± 10        | 0.37 ± 0.01        | 5.3 ± 0.3          | 546 ± 115 | 0 ± 0     | 90 ± 0.7(*)     | 3.85 ± 0.30        | 129 ± 3         | 1.5 ± 0.1       |
|              | Day 90           | 3.9 ± 0.4      | 44 ± 12      | 384 ± 642(*) | 199 ± 404 | 27 ± 12    | 0.08 ± 0.04          | 65 ± 12             | 68 ± 20         | 0.41 ± 0.06        | 5 ± 0.5            | 523 ± 136 | 1 ± 1     | 94.1 ± 7.9      | 3.76 ± 0.27        | 138 ± 11        | 1.3 ± 0.2       |
| Sham         | Day 2            | 2.9 ± 0.3      | 44 ± 7       | 111 ± 17     | 25 ± 3    | 29 ± 2     | 0.09 ± 0.03          | 90 ± 13             | 112 ± 11        | 0.29 ± 0.01        | 4.6 ± 0.3          | 363 ± 182 | 0 ± 0     | 102.4 ± 1.3     | 4.38 ± 0.42        | 137 ± 2         | 1.7 ± 0.1       |
|              | Day 10           | 3.6 ± 0.2      | 46 ± 2       | 100 ± 17     | 14 ± 4    | 34 ± 2     | 0.10 ± 0.03          | 87 ± 8              | 95 ± 8          | 0.40 ± 0.02        | 5.2 ± 0.2          | 689 ± 247 | 0 ± 0     | 99.1 ± 0.6      | 4.26 ± 0.46        | 146 ± 3         | 1.6 ± 0.2       |
|              | Day 28           | 3.9 ± 0.4      | 29 ± 2       | 85 ± 22      | 37 ± 6    | 46 ± 6     | 0.07 ± 0.02          | 83 ± 8              | 160 ± 9         | 0.32 ± 0.05        | 5.4 ± 0.4          | 372 ± 343 | 0 ± 0     | 88.1 ± 0.9      | 3.98 ± 0.25        | 126 ± 2         | 1.4 ± 0.2       |
|              | Day 90           | 4.5 ± 0.4      | 43 ± 6       | 67 ± 10      | 13 ± 1    | 19 ± 2     | 0.05 ± 0.03          | 98 ± 6              | 111 ± 11        | 0.43 ± 0.02        | 6.0 ± 0.4          | 337 ± 163 | 1 ± 0     | 96.2 ± 1.7      | 3.87 ± 0.18        | 142 ± 11        | 1.5 ± 0.1       |

**Table S7.** Haematological parameters in male rats. Ordered by experimental group, the descriptive statistics of centralization and dispersion (mean and standard deviation) and the statistical significance obtained by one-way non-parametric ANOVA (Kruskal-Wallis test, according to the levels of significance: (\*)  $p < 0.05$  and (\*\*)  $p < 0.01$  are included). MI-ADSC-CS, MI-CS and Sham-ADSC-CS vs. Sham control group. Analysis was performed in 3 animals per each experimental group and sex for day 2 and 10 post-implant and in 5 animals for day 28 and 90 post-implant. Reticulocytes were not determined (n.d.) on Day 28.

| MALE         | Time of analysis | RBC<br>( $\times 10^6$ cell/ml) | WBC<br>( $\times 10^3$ cell/ml) | Haemoglobin<br>(g/dl) | Hematocrit<br>(%) | MCV<br>(fL)        | MCH<br>(pg)    | MCHC<br>(g/dl) | Platelet<br>( $\times 10^3$ cell/ml) | Reticulocytes<br>(%) |
|--------------|------------------|---------------------------------|---------------------------------|-----------------------|-------------------|--------------------|----------------|----------------|--------------------------------------|----------------------|
| MI-ADSC-CS   | Day 2            | 7.59 $\pm$ 0.21                 | 7.42 $\pm$ 1.40                 | 13.4 $\pm$ 0.2        | 39.9 $\pm$ 0.3    | 52.6 $\pm$ 1.1     | 17.6 $\pm$ 0.2 | 33.5 $\pm$ 0.3 | 879 $\pm$ 86                         | 3 $\pm$ 1            |
|              | Day 10           | 8.39 $\pm$ 0.27                 | 8.90 $\pm$ 2.13                 | 14.6 $\pm$ 0.5        | 42.6 $\pm$ 0.8    | 50.8 $\pm$ 0.8     | 17.4 $\pm$ 0.3 | 34.3 $\pm$ 0.6 | 1034 $\pm$ 40                        | 2 $\pm$ 0            |
|              | Day 28           | 9.13 $\pm$ 0.27                 | 7.08 $\pm$ 0.41                 | 16.0 $\pm$ 0.3(*)     | 45.9 $\pm$ 1.1    | 50.2 $\pm$ 0.5(*)  | 17.6 $\pm$ 0.2 | 34.9 $\pm$ 0.4 | 1160 $\pm$ 96                        | n.d.                 |
|              | Day 90           | 8.00 $\pm$ 1.55                 | 6.23 $\pm$ 1.26                 | 12.8 $\pm$ 4.1        | 36.9 $\pm$ 10.6   | 45.3 $\pm$ 5.6     | 15.5 $\pm$ 2.6 | 34.2 $\pm$ 1.7 | 1129 $\pm$ 28                        | 6 $\pm$ 8            |
| MI-CS        | Day 2            | 7.45 $\pm$ 1.50                 | 6.50 $\pm$ 1.4                  | 14.4 $\pm$ 0          | 38.9 $\pm$ 6.3    | 52.5 $\pm$ 2.3     | 19.8 $\pm$ 3.5 | 37.5 $\pm$ 4.7 | 922 $\pm$ 209                        | 2 $\pm$ 1            |
|              | Day 10           | 8.14 $\pm$ 0.02(*)              | 9.06 $\pm$ 2.20                 | 14.5 $\pm$ 0.1        | 41.3 $\pm$ 0.9    | 50.8 $\pm$ 1.2     | 17.9 $\pm$ 0.1 | 35.2 $\pm$ 0.7 | 942 $\pm$ 116                        | 2 $\pm$ 0            |
|              | Day 28           | 8.87 $\pm$ 0.16                 | 7.12 $\pm$ 0.27                 | 15.2 $\pm$ 0.2        | 43.9 $\pm$ 0.7    | 49.5 $\pm$ 0.1(**) | 17.2 $\pm$ 0.1 | 34.7 $\pm$ 0.2 | 1071 $\pm$ 68                        | n.d.                 |
|              | Day 90           | 8.81 $\pm$ 0.24                 | 6.31 $\pm$ 0.70                 | 14.7 $\pm$ 0.6        | 42.8 $\pm$ 0.7    | 48.6 $\pm$ 0.5     | 16.7 $\pm$ 0.5 | 34.4 $\pm$ 0.9 | 1112 $\pm$ 51                        | 1 $\pm$ 1            |
| Sham-ADSC-CS | Day 2            | 8.21 $\pm$ 0.19                 | 9.79 $\pm$ 2.86                 | 14.4 $\pm$ 0.4        | 42.1 $\pm$ 0.7    | 51.2 $\pm$ 0.4     | 17.5 $\pm$ 0.1 | 34.3 $\pm$ 0.4 | 786 $\pm$ 367                        | 1 $\pm$ 0            |
|              | Day 10           | 8.28 $\pm$ 0.02                 | 12.22 $\pm$ 3.37                | 14.4 $\pm$ 0.2        | 41.5 $\pm$ 0.7    | 50.1 $\pm$ 1       | 17.3 $\pm$ 0.3 | 34.6 $\pm$ 0.4 | 1016 $\pm$ 76                        | 3 $\pm$ 0            |
|              | Day 28           | 8.95 $\pm$ 0.5                  | 5.79 $\pm$ 1.93                 | 15.5 $\pm$ 0.8        | 44.9 $\pm$ 3.1    | 50.2 $\pm$ 1.1     | 17.3 $\pm$ 0.3 | 34.5 $\pm$ 0.7 | 999 $\pm$ 242                        | n.d.                 |
|              | Day 90           | 8.50 $\pm$ 0.08                 | 6.53 $\pm$ 2.43                 | 14.5 $\pm$ 0.7        | 42.1 $\pm$ 1.5    | 49.5 $\pm$ 1.3     | 17.1 $\pm$ 0.6 | 34.5 $\pm$ 0.5 | 955 $\pm$ 71                         | 1 $\pm$ 1            |
| Sham         | Day 2            | 8.35 $\pm$ 0.10                 | 12.23 $\pm$ 1.99                | 14.8 $\pm$ 0.3        | 42.8 $\pm$ 0.5    | 51.3 $\pm$ 0.2     | 17.7 $\pm$ 0.2 | 34.6 $\pm$ 0.4 | 917 $\pm$ 187                        | 2 $\pm$ 0            |
|              | Day 10           | 8.30 $\pm$ 0.10                 | 9.23 $\pm$ 1.40                 | 14.5 $\pm$ 0.7        | 42.5 $\pm$ 1.7    | 51.2 $\pm$ 1.5     | 17.4 $\pm$ 0.7 | 34.0 $\pm$ 0.5 | 724 $\pm$ 197                        | 3 $\pm$ 2            |
|              | Day 28           | 8.42 $\pm$ 0.43                 | 5.96 $\pm$ 0.55                 | 14.9 $\pm$ 0.6        | 44.1 $\pm$ 1.9    | 52.4 $\pm$ 0.9     | 17.7 $\pm$ 0.3 | 33.8 $\pm$ 0.4 | 997 $\pm$ 31                         | n.d.                 |
|              | Day 90           | 8.47 $\pm$ 1.18                 | 7.61 $\pm$ 3.79                 | 13.9 $\pm$ 3.4        | 39.9 $\pm$ 9.5    | 46.5 $\pm$ 6.1     | 16.2 $\pm$ 2.3 | 34.8 $\pm$ 0.6 | 1128 $\pm$ 69                        | 4 $\pm$ 2            |

**Table S8.** Haematological parameters in female rats. Ordered by experimental group, the descriptive statistics of centralization and dispersion (mean and standard deviation) and the statistical significance obtained by the one-way non-parametric ANOVA (Kruskal-Wallis test, according to the levels of significance: (\*)  $p < 0.05$  and (\*\*)  $p < 0.01$  are included). MI-ADSC-CS, MI-CS and Sham-ADSC-CS vs. Sham control group. Analysis was performed in 3 animals per each experimental group and sex for day 2 and 10 post-implant and in 5 animals for day 28 and 90 post-implant. Reticulocytes were not determined (n.d.) on Day 28.

| FEMALE       | Time of analysis | RBC<br>( $\times 10^6$ cell/ml) | WBC<br>( $\times 10^3$ cell/ml) | Haemoglobin<br>(g/dl) | Hematocrit<br>(%) | MCV<br>(fL)    | MCH<br>(pg)    | MCHC<br>(g/dl) | Platelet<br>( $\times 10^3$ cell/ml) | Reticulocytes<br>(%) |
|--------------|------------------|---------------------------------|---------------------------------|-----------------------|-------------------|----------------|----------------|----------------|--------------------------------------|----------------------|
| MI-ADSC-CS   | Day 2            | 7.11 $\pm$ 0.32                 | 3.90 $\pm$ 1.18                 | 13.1 $\pm$ 0.7        | 38.7 $\pm$ 1.4    | 54.5 $\pm$ 0.4 | 18.4 $\pm$ 0.3 | 33.7 $\pm$ 0.7 | 665 $\pm$ 35                         | 3 $\pm$ 0            |
|              | Day 10           | 7.75 $\pm$ 0.12                 | 3.59 $\pm$ 1.22                 | 14.2 $\pm$ 0.1        | 41.3 $\pm$ 0.8    | 53.3 $\pm$ 0.2 | 18.3 $\pm$ 0.4 | 34.3 $\pm$ 0.8 | 936 $\pm$ 15                         | 2 $\pm$ 0            |
|              | Day 28           | 8.60 $\pm$ 0.43                 | 4.01 $\pm$ 2.34                 | 15.7 $\pm$ 0.3        | 45.6 $\pm$ 0.9    | 51.6 $\pm$ 0.7 | 17.8 $\pm$ 0.3 | 34.5 $\pm$ 0.2 | 1010 $\pm$ 85                        | n.d.                 |
|              | Day 90           | 8.21 $\pm$ 0.39                 | 3.57 $\pm$ 1.03                 | 14.7 $\pm$ 0.3        | 43.1 $\pm$ 0.5    | 52.6 $\pm$ 2.1 | 17.9 $\pm$ 0.4 | 34.0 $\pm$ 0.5 | 921 $\pm$ 77                         | 1 $\pm$ 1            |
| MI-CS        | Day 2            | 8.00 $\pm$ 0.30                 | 3.97 $\pm$ 1.42                 | 14.5 $\pm$ 0.3        | 42.6 $\pm$ 1.8    | 53.3 $\pm$ 0.4 | 18.2 $\pm$ 0.4 | 34.1 $\pm$ 0.8 | 864 $\pm$ 135                        | 2 $\pm$ 1            |
|              | Day 10           | 7.84 $\pm$ 0.26                 | 3.39 $\pm$ 0.67                 | 14.3 $\pm$ 0.5        | 41.7 $\pm$ 1.2    | 53.2 $\pm$ 0.9 | 18.2 $\pm$ 0   | 34.2 $\pm$ 0.7 | 1255 $\pm$ 89                        | 3 $\pm$ 1            |
|              | Day 28           | 9.34 $\pm$ 1.14                 | 3.68 $\pm$ 2.32                 | 16.8 $\pm$ 1.7        | 48.0 $\pm$ 3.9    | 51.6 $\pm$ 2.3 | 18.0 $\pm$ 0.5 | 35.0 $\pm$ 0.9 | 1101 $\pm$ 231                       | n.d.                 |
|              | Day 90           | 8.98 $\pm$ 1.84                 | 4.63 $\pm$ 0.77                 | 16.1 $\pm$ 2.9        | 46.0 $\pm$ 8.1    | 51.4 $\pm$ 1.3 | 18.0 $\pm$ 0.4 | 35.0 $\pm$ 0.2 | 751 $\pm$ 105                        | 1 $\pm$ 1            |
| Sham-ADSC-CS | Day 2            | 7.47 $\pm$ 0.31                 | 4.57 $\pm$ 0.20                 | 13.4 $\pm$ 0.40       | 38.9 $\pm$ 1.8    | 52.2 $\pm$ 0.5 | 18.0 $\pm$ 0.3 | 34.4 $\pm$ 0.5 | 821 $\pm$ 61                         | 2 $\pm$ 1            |
|              | Day 10           | 7.50 $\pm$ 0.48                 | 3.87 $\pm$ 0.65                 | 13.9 $\pm$ 0.8        | 40.0 $\pm$ 1.8    | 53.4 $\pm$ 1.1 | 18.5 $\pm$ 0.2 | 34.7 $\pm$ 0.4 | 1031 $\pm$ 80                        | 2 $\pm$ 0            |
|              | Day 28           | 8.37 $\pm$ 0.13                 | 4.39 $\pm$ 1.26                 | 15.0 $\pm$ 0.1        | 43.9 $\pm$ 0.4    | 52.5 $\pm$ 0.6 | 18.0 $\pm$ 0.3 | 34.2 $\pm$ 0.2 | 835 $\pm$ 100                        | n.d.                 |
|              | Day 90           | 8.86 $\pm$ 0.75                 | 5.63 $\pm$ 1.91                 | 15.6 $\pm$ 1.3        | 45.8 $\pm$ 3.7    | 51.7 $\pm$ 0.7 | 17.6 $\pm$ 0.4 | 34.1 $\pm$ 0.3 | 879 $\pm$ 128                        | 2 $\pm$ 1            |
| Sham         | Day 2            | 7.19 $\pm$ 0.39                 | 5.29 $\pm$ 1.37                 | 13.2 $\pm$ 0.9        | 38.5 $\pm$ 1.8    | 53.6 $\pm$ 0.6 | 18.4 $\pm$ 0.3 | 34.2 $\pm$ 1   | 747 $\pm$ 62                         | 2 $\pm$ 0            |
|              | Day 10           | 6.80 $\pm$ 0.18                 | 2.80 $\pm$ 0.64                 | 13.1 $\pm$ 0.2        | 39.2 $\pm$ 1.1    | 57.7 $\pm$ 3.3 | 19.2 $\pm$ 0.8 | 33.3 $\pm$ 0.4 | 944 $\pm$ 51                         | 3 $\pm$ 1            |
|              | Day 28           | 8.51 $\pm$ 0.39                 | 4.65 $\pm$ 0.68                 | 15.2 $\pm$ 0.8        | 44.7 $\pm$ 2      | 52.5 $\pm$ 1.1 | 17.9 $\pm$ 0.2 | 34.1 $\pm$ 0.4 | 822 $\pm$ 90                         | n.d.                 |
|              | Day 90           | 8.37 $\pm$ 0.27                 | 3.69 $\pm$ 1.64                 | 14.4 $\pm$ 0.6        | 41.6 $\pm$ 1.6    | 49.6 $\pm$ 0.6 | 17.2 $\pm$ 0.4 | 34.6 $\pm$ 0.3 | 887 $\pm$ 93                         | 3 $\pm$ 1            |

**Table S9.** Urine Biochemistry parameters for males. Ordered by experimental group, the descriptive statistics of centralization and dispersion (mean and standard deviation) and the statistical significance obtained in the one-way non-parametric ANOVA (Kruskal-Wallis test, according to the levels of significance: (\*)  $p < 0.05$  and (\*\*)  $p < 0.01$  are included). MI-ADSC-CS, MI-CS and Sham-ADSC-CS vs. Sham control group results are represented. Analysis was performed in 3 animals per each experimental group and sex for day 2 and 10 post-implant and in 5 animals for day 90 post-implant. Nitrites are represented as a positive or negative (in brackets the number of animals positive or negative from the total animals).

| MALE             |        | Density<br>(mg/dl) | pH            | Leukocytes<br>(cel/ $\mu$ l) | Nitrites       | Proteins<br>(mg/dl) | Glucose      | Ketonic<br>bodies<br>(mg/dl) | Urobilinogen<br>(mg/dl) | Bilirubine<br>(mg/dl) | Erythrocytes<br>(cel/ $\mu$ l) |
|------------------|--------|--------------------|---------------|------------------------------|----------------|---------------------|--------------|------------------------------|-------------------------|-----------------------|--------------------------------|
| MI-ADSC-<br>CS   | Day 2  | 1018 $\pm$ 3       | 6.3 $\pm$ 0.2 | 50 $\pm$ 43                  | Negative (3/3) | 41 $\pm$ 0          | Normal (5/5) | 8.3 $\pm$ 5.7                | Normal (3/3)            | 0.0 $\pm$ 0.0         | 20.0 $\pm$ 8.7                 |
|                  | Day 10 | 1010 $\pm$ 9       | 6.8 $\pm$ 0.2 | 0 $\pm$ 0                    | Negative (2/3) | 42 $\pm$ 29         | Normal (5/5) | 6.6 $\pm$ 7.6                | Normal (3/3)            | 0.3 $\pm$ 0.5         | 6.6 $\pm$ 5.7                  |
|                  | Day 90 | 1019 $\pm$ 9       | 6.4 $\pm$ 0.2 | 40 $\pm$ 0                   | Negative (3/5) | 45 $\pm$ 29         | Normal (5/5) | 13.0 $\pm$ 7.6               | Normal (5/5)            | 0.0 $\pm$ 0.0         | 9.1 $\pm$ 5.7                  |
| MI-CS            | Day 2  | 1021 $\pm$ 3       | 6.3 $\pm$ 0.2 | 75 $\pm$ 43                  | Negative (2/3) | 75 $\pm$ 0          | Normal (5/5) | 15.0 $\pm$ 0.0               | Normal (3/3)            | 0.0 $\pm$ 0.0         | 7.3 $\pm$ 5.7                  |
|                  | Day 10 | 1007 $\pm$ 3       | 7.0 $\pm$ 0   | 13 $\pm$ 18                  | Negative (2/3) | 25 $\pm$ 0          | Normal (5/5) | 0.0 $\pm$ 0.0                | Normal (2/2)            | 0.0 $\pm$ 0.0         | 5.0 $\pm$ 7.0                  |
|                  | Day 90 | 1020 $\pm$ 5       | 6.2 $\pm$ 0.2 | 65 $\pm$ 49                  | Positive (3/5) | 35 $\pm$ 22         | Normal (5/5) | 14.0 $\pm$ 21.0              | Normal (5/5)            | 0.2 $\pm$ 0.4         | 11.1 $\pm$ 8.4                 |
| Sham-<br>ADSC-CS | Day 2  | 1022 $\pm$ 3       | 6.0 $\pm$ 0   | 100 $\pm$ 0                  | Negative (2/3) | 66 $\pm$ 72         | Normal (5/5) | 15.0 $\pm$ 0.0               | Normal (3/3)            | 0.0 $\pm$ 0.0         | 100.6 $\pm$ 130.9              |
|                  | Day 10 | 1014 $\pm$ 3       | 7.0 $\pm$ 0   | 17 $\pm$ 13                  | Positive (2/3) | 25 $\pm$ 0          | Normal (5/5) | 1.6 $\pm$ 2.8                | Normal (3/3)            | 0.0 $\pm$ 0.0         | 3.3 $\pm$ 5.7                  |
|                  | Day 90 | 1010 $\pm$ 8       | 6.5 $\pm$ 0.7 | 50 $\pm$ 70                  | Negative (5/5) | 13 $\pm$ 17         | Normal (5/5) | 2.5 $\pm$ 3.5                | Normal (5/5)            | 0.0 $\pm$ 0.0         | 5.3 $\pm$ 7.1                  |
| Sham             | Day 2  | 1023 $\pm$ 3       | 6.2 $\pm$ 0.2 | 25 $\pm$ 0                   | Negative (2/3) | 42 $\pm$ 29         | Normal (5/5) | 12.0 $\pm$ 5.7               | Normal (3/3)            | 0.7 $\pm$ 0.6         | 20.0 $\pm$ 8.6                 |
|                  | Day 10 | 1013 $\pm$ 3       | 7.3 $\pm$ 0.6 | 25 $\pm$ 0                   | Positive (2/3) | 25 $\pm$ 0          | Normal (5/5) | 0.0 $\pm$ 0.0                | Normal (3/3)            | 0.0 $\pm$ 0.0         | 0.0 $\pm$ 0.0                  |
|                  | Day 90 | 1018 $\pm$ 6       | 6.2 $\pm$ 0.0 | 100 $\pm$ 22                 | Negative (3/5) | 35 $\pm$ 20         | Normal (4/5) | 15.0 $\pm$ 20.3              | Normal (5/5)            | 0.0 $\pm$ 0.0         | 19.0 $\pm$ 8.2                 |

**Table S10.** Urine Biochemistry parameters for males. Ordered by experimental group, the descriptive statistics of centralization and dispersion (mean and standard deviation) and the statistical significance obtained by the one-way non-parametric ANOVA (Kruskal-Wallis test, according to the levels of significance (\*)  $p < 0.05$  and (\*\*)  $p < 0.01$  are included). MI-ADSC-CS, MI-CS and Sham-ADSC-CS vs. Sham control group results are represented. Analysis was performed in 3 animals per each experimental group and sex for day 2 and 10 post-implant and in 5 animals for day 90 post-implant. Nitrites are represented as a positive or negative (in brackets the number of animals positive or negative from the total animals).

| FEMALE           |        | Density<br>(mg/dl) | pH            | Leukocytes<br>(cel/ $\mu$ l) | Nitrites       | Proteins<br>(mg/dl) | Glucose      | Ketonic bodies<br>(mg/dl) | Urobilinogen<br>(mg/dl) | Bilirubine<br>(mg/dl) | Erythrocytes<br>(cel/ $\mu$ l) |
|------------------|--------|--------------------|---------------|------------------------------|----------------|---------------------|--------------|---------------------------|-------------------------|-----------------------|--------------------------------|
| MI-ADSC-<br>CS   | Day 2  | 1017 $\pm$ 6       | 6.5 $\pm$ 0.5 | 16 $\pm$ 14                  | Negative (3/3) | 16 $\pm$ 13         | Normal (3/3) | 2.1 $\pm$ 2.9             | Normal (3/3)            | 0.6 $\pm$ 0.6         | 11.6 $\pm$ 12.5                |
|                  | Day 10 | 1016 $\pm$ 10      | 6.5 $\pm$ 0.5 | 8 $\pm$ 14                   | Negative (3/3) | 33 $\pm$ 38         | Normal (3/3) | 5.3 $\pm$ 8.6             | Normal (3/3)            | 0.3 $\pm$ 0.6         | 0.0 $\pm$ 0.0                  |
|                  | Day 90 | 1012 $\pm$ 10      | 8.3 $\pm$ 0.5 | 183 $\pm$ 274                | Positive (2/3) | 176 $\pm$ 281       | Normal (3/3) | 5.3 $\pm$ 8.6             | Normal (2/3)            | 0.0 $\pm$ 0.0         | 11.6 $\pm$ 12.5                |
| MI-CS            | Day 2  | 1017 $\pm$ 6       | 6.5 $\pm$ 0.5 | 16 $\pm$ 14                  | Negative (2/3) | 33 $\pm$ 38         | Normal (3/3) | 5.3 $\pm$ 8.6             | Normal (3/3)            | 0.6 $\pm$ 0.0         | 8.3 $\pm$ 4.4                  |
|                  | Day 10 | 1017 $\pm$ 6       | 7.0 $\pm$ 1.0 | 8 $\pm$ 14                   | Negative (2/3) | 25 $\pm$ 0          | Normal (3/3) | 0.0 $\pm$ 0.0             | Normal (3/3)            | 0.0 $\pm$ 0.0         | 20.0 $\pm$ 26.4                |
|                  | Day 90 | 1012 $\pm$ 8       | 7.5 $\pm$ 1.0 | 8 $\pm$ 14                   | Positive (3/3) | 8 $\pm$ 14          | Normal (3/3) | 0.0 $\pm$ 0.0             | Normal (3/3)            | 0.0 $\pm$ 0.0         | 0 $\pm$ 0                      |
| Sham-<br>ADSC-CS | Day 2  | 1021 $\pm$ 9       | 6.3 $\pm$ 0.5 | 66 $\pm$ 57                  | Negative (2/3) | 33 $\pm$ 38         | Normal (3/3) | 10.6 $\pm$ 8.6            | Normal (2/3)            | 0.0 $\pm$ 0.0         | 25 $\pm$ 25.0                  |
|                  | Day 10 | 1018 $\pm$ 3       | 6.5 $\pm$ 0.0 | 16 $\pm$ 14                  | Negative (2/3) | 33 $\pm$ 38         | Normal (3/3) | 3.3 $\pm$ 2.9             | Normal (2/3)            | 0.0 $\pm$ 0.0         | 11.6 $\pm$ 12.5                |
|                  | Day 90 | 1017 $\pm$ 6       | 6.2 $\pm$ 0.7 | 20 $\pm$ 11                  | Negative (5/5) | 20 $\pm$ 11         | Normal (5/5) | 1.1 $\pm$ 2.23            | Normal (5/5)            | 0.2 $\pm$ 0.4         | 7.0 $\pm$ 10.9                 |
| Sham             | Day 2  | 1025 $\pm$ 0       | 5.6 $\pm$ 0.5 | 25 $\pm$ 0                   | Positive (2/3) | 58 $\pm$ 28         | Normal (3/3) | 23.3 $\pm$ 23.6           | Normal (2/3)            | 1.0 $\pm$ 0.0         | 15.0 $\pm$ 8.6                 |
|                  | Day 10 | 1021 $\pm$ 7       | 6.0 $\pm$ 0.9 | 16 $\pm$ 14                  | Positive (2/3) | 33 $\pm$ 38         | Normal (3/3) | 6.6 $\pm$ 7.6             | Normal (2/3)            | 0.0 $\pm$ 0.0         | 8.3 $\pm$ 14.4                 |
|                  | Day 90 | 1019 $\pm$ 4       | 6.2 $\pm$ 0.2 | 143 $\pm$ 237.               | Negative (4/5) | 20 $\pm$ 11         | Normal (5/5) | 6.8 $\pm$ 5.47            | Normal (5/5)            | 0.0 $\pm$ 0.0         | 6.0 $\pm$ 5.5                  |



**Table S11.** Relative weight of organs in males. The weight of each organ was normalized against the net weight of the animals. The data obtained from the animals euthanized at days 2, 10 and 90 is shown. Ordered by experimental group, the descriptive statistics of centralization and dispersion (mean and standard deviation) and the statistical significance obtained by the one-way non-parametric ANOVA (Kruskal-Wallis test, according to the levels of significance (\*)  $p < 0.05$  and (\*\*)  $p < 0.01$  are included). MI-ADSC-CS, MI-CS and Sham-ADSC-CS vs Sham control group results are represented. Analysis was performed in 3 animals per each experimental group and sex for day 2 and 10 post-implant and in 5 animals for day 90 post-implant.

| MALES        |        | Relative weight of organs (%) |               |               |               |               |               |               |               |               |               |               |
|--------------|--------|-------------------------------|---------------|---------------|---------------|---------------|---------------|---------------|---------------|---------------|---------------|---------------|
|              |        | Spleen                        | Brain         | Heart         | Liver         | Thyroids      | Kidney        |               | Adrenals      |               | Testis        |               |
|              |        |                               |               |               |               |               | Right         | Left          | Right         | Left          | Right         | Left          |
| MI-ADSC-CS   | Day 2  | 0.200 ± 0.023                 | 0.561 ± 0.036 | 0.251 ± 0.139 | 3.651 ± 0.243 | 0.009 ± 0.002 | 0.393 ± 0.020 | 0.366 ± 0.022 | 0.011 ± 0.001 | 0.011 ± 0.001 | 0.376 ± 0.070 | 0.416 ± 0.056 |
|              | Day 10 | 0.198 ± 0.031                 | 0.578 ± 0.030 | 0.366 ± 0.021 | 3.015 ± 0.235 | 0.021 ± 0.008 | 0.344 ± 0.014 | 0.347 ± 0.022 | 0.010 ± 0.002 | 0.012 ± 0.001 | 0.425 ± 0.011 | 0.499 ± 0.176 |
|              | Day 90 | 0.185 ± 0.033                 | 0.508 ± 0.086 | 0.354 ± 0.087 | 3.288 ± 0.148 | 0.023 ± 0.005 | 0.313 ± 0.030 | 0.313 ± 0.034 | 0.009 ± 0.002 | 0.010 ± 0.001 | 0.312 ± 0.038 | 0.365 ± 0.058 |
| MI-CS        | Day 2  | 0.193 ± 0.006                 | 0.533 ± 0.048 | 0.394 ± 0.041 | 3.634 ± 0.174 | 0.028 ± 0.008 | 0.361 ± 0.024 | 0.361 ± 0.004 | 0.010 ± 0.003 | 0.011 ± 0.001 | 0.410 ± 0.039 | 0.404 ± 0.034 |
|              | Day 10 | 0.175 ± 0.009                 | 0.576 ± 0.058 | 0.341 ± 0.020 | 3.129 ± 0.174 | 0.032 ± 0.004 | 0.358 ± 0.009 | 0.341 ± 0.011 | 0.011 ± 0.001 | 0.013 ± 0.003 | 0.458 ± 0.036 | 0.459 ± 0.032 |
|              | Day 90 | 0.146 ± 0.014                 | 0.454 ± 0.021 | 0.285 ± 0.022 | 3.059 ± 0.220 | 0.020 ± 0.004 | 0.310 ± 0.019 | 0.310 ± 0.015 | 0.009 ± 0.003 | 0.008 ± 0.001 | 0.341 ± 0.021 | 0.333 ± 0.025 |
| Sham-ADSC-CS | Day 2  | 0.198 ± 0.020                 | 0.555 ± 0.022 | 0.310 ± 0.014 | 3.882 ± 0.205 | 0.029 ± 0.003 | 0.392 ± 0.021 | 0.388 ± 0.009 | 0.011 ± 0.002 | 0.010 ± 0.002 | 0.414 ± 0.024 | 0.443 ± 0.028 |
|              | Day 10 | 0.207 ± 0.006                 | 0.521 ± 0.014 | 0.352 ± 0.014 | 3.448 ± 0.100 | 0.037 ± 0.001 | 0.356 ± 0.022 | 0.370 ± 0.019 | 0.012 ± 0.001 | 0.011 ± 0.002 | 0.419 ± 0.022 | 0.409 ± 0.018 |
|              | Day 90 | 0.142 ± 0.003                 | 0.440 ± 0.003 | 0.333 ± 0.010 | 3.170 ± 0.035 | 0.137 ± 0.163 | 0.323 ± 0.004 | 0.331 ± 0.022 | 0.007 ± 0.000 | 0.006 ± 0.001 | 0.345 ± 0.002 | 0.353 ± 0.003 |
| Sham         | Day 2  | 0.197 ± 0.012                 | 0.538 ± 0.031 | 0.280 ± 0.019 | 3.723 ± 0.369 | 0.008 ± 0.001 | 0.370 ± 0.010 | 0.381 ± 0.007 | 0.010 ± 0.002 | 0.010 ± 0.002 | 0.420 ± 0.040 | 0.410 ± 0.048 |
|              | Day 10 | 0.185 ± 0.015                 | 0.601 ± 0.022 | 0.292 ± 0.011 | 3.223 ± 0.240 | 0.031 ± 0.005 | 0.375 ± 0.029 | 0.367 ± 0.025 | 0.010 ± 0.002 | 0.011 ± 0.002 | 0.456 ± 0.024 | 0.453 ± 0.018 |
|              | Day 90 | 0.155 ± 0.014                 | 0.461 ± 0.039 | 0.311 ± 0.026 | 3.507 ± 0.308 | 0.020 ± 0.004 | 0.338 ± 0.022 | 0.334 ± 0.031 | 0.010 ± 0.002 | 0.007 ± 0.001 | 0.359 ± 0.041 | 0.359 ± 0.045 |

**Table S12.** Relative weight of organs in females. The weight of each organ was normalized against the net weight of the animals. The data obtained from the animals euthanized at days 2, 10 and 90 is shown. Ordered by experimental group, the descriptive statistics of centralization and dispersion (mean and standard deviation) and the statistical significance obtained by the one-way non-parametric ANOVA (Kruskal-Wallis test, according to the levels of significance (\*)  $p < 0.05$  and (\*\*)  $p < 0.01$  are included). MI-ADSC-CS, MI-CS and Sham-ADSC-CS vs Sham control group results are represented. Analysis was performed in 3 animals per each experimental group and sex for day 2 and 10 post-implant and in 5 animals for day 90 post-implant.

| FEMALES      |        | Relative weight of organs (%) |               |                  |               |                   |                |                |               |               |                  |                  |
|--------------|--------|-------------------------------|---------------|------------------|---------------|-------------------|----------------|----------------|---------------|---------------|------------------|------------------|
|              |        | Spleen                        | Brain         | Heart            | Liver         | Thyroids          | Kidney         |                | Adrenals      |               | Ovary            |                  |
|              |        |                               |               |                  |               |                   | Right          | Left           | Right         | Left          | Right            | Left             |
| MI-ADSC-CS   | Day 2  | 0.199 ± 0.015                 | 0.926 ± 0.050 | 0.428 ± 0.065    | 3.681 ± 0.252 | 0.011 ± 0.003     | 0.382 ± 0.023  | 0.389 ± 0.029  | 0.022 ± 0.003 | 0.021 ± 0.004 | 0.028 ± 0.007    | 0.027 ± 0.006    |
|              |        | 0.230 ± 0.027                 | 0.954 ± 0.025 | 0.393 ± 0.031    | 3.252 ± 0.382 | 0.024 ± 0.001     | 0.247 ± 0.214  | 0.248 ± 0.215  | 0.020 ± 0.001 | 0.022 ± 0.003 | 0.026 ± 0.005    | 0.026 ± 0.005    |
|              | Day 90 | 0.162 ± 0.049                 | 0.803 ± 0.009 | 0.397 ± 0.023(*) | 3.136 ± 0.130 | 0.012 ± 0.002(*)  | 0.359 ± 0.014  | 0.349 ± 0.009  | 0.016 ± 0.002 | 0.019 ± 0.002 | 0.019 ± 0.005    | 0.023 ± 0.003    |
| MI-CS        | Day 2  | 0.213 ± 0.012                 | 0.906 ± 0.076 | 0.435 ± 0.045    | 3.758 ± 0.224 | 0.040 ± 0.011     | 0.3983 ± 0.013 | 0.399 ± 0.021  | 0.020 ± 0.001 | 0.020 ± 0.001 | 0.024 ± 0.006    | 0.024 ± 0.004    |
|              |        | 0.198 ± 0.027                 | 0.890 ± 0.046 | 0.455 ± 0.037    | 3.410 ± 0.396 | 0.041 ± 0.004     | 0.370 ± 0.010  | 0.383 ± 0.020  | 0.016 ± 0.003 | 0.018 ± 0.004 | 0.022 ± 0.004    | 0.026 ± 0.005    |
|              | Day 90 | 0.185 ± 0.021                 | 0.813 ± 0.134 | 0.383 ± 0.065    | 3.370 ± 0.394 | 0.011 ± 0.003 (*) | 0.349 ± 0.010  | 0.359 ± 0.011  | 0.015 ± 0.003 | 0.017 ± 0.002 | 0.018 ± 0.001    | 0.018 ± 0.003    |
| Sham-ADSC-CS | Day 2  | 0.229 ± 0.004                 | 0.877 ± 0.076 | 0.339 ± 0.006    | 4.233 ± 0.394 | 0.038 ± 0.012     | 0.402 ± 0.020  | 0.406 ± 0.020  | 0.024 ± 0.001 | 0.024 ± 0.001 | 0.020 ± 0.003    | 0.024 ± 0.006    |
|              |        | 0.210 ± 0.014                 | 0.944 ± 0.038 | 0.419 ± 0.085    | 3.307 ± 0.054 | 0.048 ± 0.001     | 0.376 ± 0.012  | 0.377 ± 0.015  | 0.020 ± 0.001 | 0.022 ± 0.001 | 0.025 ± 0.001    | 0.026 ± 0.001    |
|              | Day 90 | 0.208 ± 0.019(*)              | 0.833 ± 0.076 | 0.355 ± 0.034    | 3.219 ± 0.412 | 0.039 ± 0.007     | 0.370 ± 0.016  | 0.373 ± 0.026  | 0.020 ± 0.187 | 0.019 ± 0.004 | 0.029 ± 0.002(*) | 0.036 ± 0.006(*) |
| Sham         | Day 2  | 0.216 ± 0.014                 | 0.879 ± 0.072 | 0.357 ± 0.031    | 3.833 ± 0.150 | 0.009 ± 0.003     | 0.405 ± 0.025  | 0.387 ± 0.008  | 0.020 ± 0.001 | 0.021 ± 0.001 | 0.023 ± 0.003    | 0.026 ± 0.002    |
|              |        | 0.228 ± 0.019                 | 0.886 ± 0.019 | 0.348 ± 0.021    | 3.427 ± 0.183 | 0.040 ± 0.012     | 0.372 ± 0.014  | 0.3763 ± 0.019 | 0.019 ± 0.001 | 0.021 ± 0.003 | 0.021 ± 0.002    | 0.025 ± 0.005    |
|              | Day 90 | 0.157 ± 0.009                 | 0.757 ± 0.031 | 0.305 ± 0.025    | 3.189 ± 0.331 | 0.036 ± 0.005     | 0.358 ± 0.033  | 0.358 ± 0.030  | 0.017 ± 0.002 | 0.017 ± 0.001 | 0.019 ± 0.004    | 0.019 ± 0.002    |
